# Supplementary material for: Prevalence and incidence of kidney diseases leading to hospital admission in people living with HIV in France: an observational nationwide study
Source: PubMed Central journal article supplement — BMJ Open. 2019 May 5;9(5):e029211. doi: 10.1136/bmjopen-2019-029211 (PMC6501953; doi:10.1136/bmjopen-2019-029211), 2019-05-05
Supplement: bmjopen-2019-029211.draft_revisions.pdf [file bmjopen-2019-029211.draft_revisions.pdf]

# BMJ Open

BMJ Open is committed to open peer review. As part of this commitment we make the peer review history of every article we publish publicly available.

When an article is published we post the peer reviewers' comments and the authors' responses online. We also post the versions of the paper that were used during peer review. These are the versions that the peer review comments apply to.

The versions of the paper that follow are the versions that were submitted during the peer review process. They are not the versions of record or the final published versions. They should not be cited or distributed as the published version of this manuscript.

BMJ Open is an open access journal and the full, final, typeset and author-corrected version of record of the manuscript is available on our site with no access controls, subscription charges or pay-per-view fees (<http://bmjopen.bmj.com>).

If you have any questions on BMJ Open's open peer review process please email [info.bmjopen@bmj.com](mailto:info.bmjopen@bmj.com)

# BMJ Open

## People living with HIV hospitalised for kidney disease: a nationwide survey

|                               |                                                                                                                                                                                                                                                                                                                                                                                                                                                                                                                                                                                                                                                                                                                                                                                                                                                                             |
|-------------------------------|-----------------------------------------------------------------------------------------------------------------------------------------------------------------------------------------------------------------------------------------------------------------------------------------------------------------------------------------------------------------------------------------------------------------------------------------------------------------------------------------------------------------------------------------------------------------------------------------------------------------------------------------------------------------------------------------------------------------------------------------------------------------------------------------------------------------------------------------------------------------------------|
| Journal:                      | <i>BMJ Open</i>                                                                                                                                                                                                                                                                                                                                                                                                                                                                                                                                                                                                                                                                                                                                                                                                                                                             |
| Manuscript ID                 | bmjopen-2019-029211                                                                                                                                                                                                                                                                                                                                                                                                                                                                                                                                                                                                                                                                                                                                                                                                                                                         |
| Article Type:                 | Research                                                                                                                                                                                                                                                                                                                                                                                                                                                                                                                                                                                                                                                                                                                                                                                                                                                                    |
| Date Submitted by the Author: | 17-Jan-2019                                                                                                                                                                                                                                                                                                                                                                                                                                                                                                                                                                                                                                                                                                                                                                                                                                                                 |
| Complete List of Authors:     | <p>louis, magali; CHU Dijon, infectious diseases<br/> Cottenet, J; CHRU Dijon, Service de Biostatistique et d'Informatique Médicale (DIM), Dijon, F-21000, France ; Université de Bourgogne, Dijon, F-21000, France<br/> salmon-rousseau, arnaud; CHU Dijon, infectious diseases<br/> blot, mathieu; CHU Dijon, infectious diseases<br/> bonnot, pierre-henri; CHU Dijon, infectious diseases<br/> rebibou, jean-michel; CHU Dijon, infectious diseases<br/> Chavanet, Pascal; CHRU de Dijon, Département d'infectiologie; Université de Bourgogne-Franche-Comté, Laboratoire microbiologie environnementale et risques sanitaires - UMR 1347<br/> mousson, christiane; CHU Dijon, infectious diseases<br/> Quantin, Catherine; CHRU Dijon, CHRU Dijon, Service de Biostatistique et d'Informatique Médicale (DIM),<br/> piroth, lionel; CHU Dijon, infectious diseases</p> |
| Keywords:                     | HIV, Nephrology < INTERNAL MEDICINE, Epidemiology < INFECTIOUS DISEASES                                                                                                                                                                                                                                                                                                                                                                                                                                                                                                                                                                                                                                                                                                                                                                                                     |
|                               |                                                                                                                                                                                                                                                                                                                                                                                                                                                                                                                                                                                                                                                                                                                                                                                                                                                                             |

SCHOLARONE™  
Manuscripts

## People living with HIV hospitalised for kidney disease: a nationwide survey

Magali LOUIS <sup>1,2</sup>, Jonathan COTTENET <sup>3</sup>, Arnaud SALMON-ROUSSEAU <sup>1</sup>, Mathieu BLOT <sup>1</sup>,  
Pierre-Henri BONNOT <sup>2</sup>, Jean-Michel REBIBOU <sup>2,4</sup>, Pascal CHAVANET <sup>1,5</sup>, Christiane MOUSSON  
<sup>2</sup>, Catherine QUANTIN <sup>3,5</sup>, Lionel PIROTH <sup>1,5</sup>

<sup>1</sup> *Département d'Infectiologie, CHU Dijon, France*

<sup>2</sup> *Service de Néphrologie, CHU Dijon, France*

<sup>3</sup> *Service de Biostatistiques et d'Informatique Médicale, CHU, et Université de Bourgogne, Dijon, France*

<sup>4</sup> *UMR 1098, Université de Bourgogne, Dijon, France*

<sup>5</sup> *INSERM, CIC 1432, Dijon, France*

### Corresponding author:

Lionel Piroth

Infectious Diseases Department, CHU de Dijon

14 rue Gaffarel

21079 Dijon Cedex, France

Tel: 33 3 80 29 33 05

Fax: 33 3 80 29 36 38

E-mail: [lionel.piroth@chu-dijon.fr](mailto:lionel.piroth@chu-dijon.fr)

**Word count (abstract): 299 Word count (text): 2850 References : 37**

1  
2  
3 **Disclosure of interest:** The authors declare no conflict of interest in relation with this article.  
4  
5

6  
7 **Contributorship statement:** ML and LP conceptualised and designed the study, interpreted  
8 the data and wrote the paper. JC performed the data analysis. ASR and CM contributed  
9 substantially to writing the manuscript. MB PHB JMR and PC participated in the  
10 interpretation of the results and reviewed and revised the manuscript drafts. CQ oversaw  
11 the data analysis and interpretation and contributed substantially to writing the manuscript.  
12  
13 All authors accept responsibility for the paper as published.  
14  
15  
16  
17

18  
19 **Funding** This research did not receive any specific grant from funding agencies in the public,  
20 commercial or not-for-profit sectors.  
21  
22

23  
24  
25 **Competing interests** None declared.  
26  
27

28  
29 **Patient and Public Involvement** this study used an anonymized database, patients were thus  
30 not involved.  
31  
32

33  
34 **Ethics:** This study was approved by the National Committee for data protection (registration  
35 number 1576793) and therefore was conducted in accordance with the Declaration of  
36 Helsinki. Since this study used an anonymized database and that patients were not involved,  
37 written consent was not needed. The PMSI database was transmitted by the national agency  
38 for the management of hospitalization data (ATIH number 2015-111111-47-33).  
39  
40  
41  
42

43  
44  
45 **Provenance and peer review** Not commissioned; externally peer reviewed.  
46  
47

48  
49 **Data sharing statement** The PMSI database was transmitted by the national agency for the  
50 management of hospitalization data. The use of these data by our department was approved  
51 by the National Committee for data protection. We are not allowed to transmit these data.  
52  
53  
54  
55  
56  
57  
58  
59  
60

**Abstract (299 words)**

**Objectives:** To describe hospitalisations for kidney disease (KD) among persons living with HIV (PLHIV) in France and to identify the factors associated with such hospitalisations since data on the epidemiology of KD leading to hospitalisation are globally scarce.

**Design:** Observational nationwide study using the French PMSI (Programme de Médicalisation des Systèmes d'Information) database.

**Setting:** France 2008-2013

**Participants:** Around 10,862 PLHIV out of a mean of 5,210,856 patients hospitalised each year. All hospital admissions with a main diagnosis code indicating KD (ICD-10 codes N00 to N39) were collected.

**Main outcome measures:** The prevalence and incidence of KD leading to hospital admission in PLHIV and the associated risk factors..

**Results:** The prevalence of patients hospitalised for KD was 1.5 higher in PLHIV than in the general population, and increased significantly from 3.0% in 2008 to 3.7% in 2013 ( $P < 0.01$ ). The main cause of hospitalisation for KD was acute renal failure (ARF, 25.4%). Glomerular diseases remained stable (6.4%) throughout the study period, focal segmental glomerulosclerosis being the main diagnosis (37.6%). Only 41.3% of patients hospitalised for glomerular disease were biopsied. The other common motives for admission were nephrolithiasis (22.1%) and pyelonephritis (22.6%).

The 5-year cumulative incidence of KD requiring hospitalisation was 5.9% in HIV patients newly diagnosed for HIV in 2009. Factors associated with a higher risk of incident KD requiring hospitalisation were age (OR=1.02, 1.00 to 1.04), cardiovascular disease (OR=3.39, 1.22 to 9.42), and, for female patients, AIDS (OR=3.67, 1.26 to 10.70). Two thirds of hospitalisations for incident ARF occurred in the first two years of follow-up.

**Conclusions:** Hospital admission for KD is more frequent in PLHIV than in the general population and increases over time. ARF remains the leading cause. Glomerular diseases are infrequently documented by renal biopsies. Older patients and those with cardiovascular disease are particularly concerned.

### Strengths and limitations of this study

- This study is the first to focus on hospital admissions for kidney disease (KD) in a large population people living with HIV (PLHIV).
- This study is a nationwide 5-year study on a mean of 10,862 PLHIV hospitalized, i.e. about 10% of the estimated cohort of 110,900 PLHIV medically followed-up in France, out of a mean of 5,210,856 patients hospitalised each year.
- It shows that the prevalence of patients hospitalised for KD is 1.5 higher in PLHIV than in the general population, and increases over time, and a 5-year cumulative incidence of 5.9%.
- The exhaustive nature of our data ensures that the results are representative of all hospitalisations for KD in France.
- The main limitation is the use of administrative codes, even though they are based on the clinical judgment of physicians and laboratory values. It was also not possible to provide accurate characteristics of the HIV infection

**Keywords:** HIV; kidney disease; acute renal failure; glomerular disease; hospitalisation

## Introduction

In 2015, 36.9 million people around the world and about 130,000 in France were living with HIV. The introduction of highly active antiretroviral therapy (HAART) has dramatically decreased mortality and significantly improved the quality of life of people living with HIV (PLHIV). However, an increase in the incidence of co-morbidities, including kidney disease (KD), has been observed<sup>1 2</sup>. Several studies have shown that acute renal failure (ARF) was three to four times more frequent in PLHIV than in the general population<sup>3</sup> and that its incidence did not decrease as HAART became more common<sup>5</sup>. ARF, in the general population and PLHIV, has also been associated with longer hospital stays and higher costs, and with a risk of progression to chronic KD (CKD)<sup>6-8</sup>.

The incidence of CKD is reportedly higher in PLHIV than in people not infected with HIV<sup>9</sup>. Its prevalence has been estimated at between 1% in the D.A.D study<sup>10</sup> and 4.9% in a French cohort of 2,588 patients<sup>11</sup>. The proportion of HIV-associated nephropathy (HIVAN) has significantly fallen<sup>12</sup>, while that of other KDs, such as classical focal segmental glomerulosclerosis (FSGS) or HIV-associated immune complex KD (HIVICK), has increased<sup>13</sup>. The increase in the incidence of CKD could also be related to the nephrotoxicity of some antiretroviral drugs or to the increased frequency of co-morbidities, such as diabetes, hypertension, cardiovascular disease, or hepatitis C or B coinfection<sup>6 10 14</sup>.

However, to our knowledge, no studies have dealt with the epidemiology of KD leading to hospitalisation in PLHIV in the recent HAART era. We thus conducted a national observational study to describe hospital admissions for KD in PLHIV in France and to identify factors associated with such admissions.

## Patients and Methods

This study was an observational retrospective multicentre study based on nationwide PMSI (Programme de Médicalisation des Systèmes d'Information) data from 2008 to 2013. The French PMSI database is similar to the Medicare database and includes all admissions in all hospitals from 1997 onwards. Since 2007, it has been possible to link all discharge abstracts for a single patient. Diagnoses identified during hospital stays are coded according to the tenth edition of the International Classification of Diseases (ICD-10). This database

1  
2  
3 provides a vast amount of epidemiological information regarding hospitalised patients in  
4 France<sup>15-18</sup>, is truly representative, and can be used to detect rare events.  
5  
6

7  
8 In the first part of the study, all patients older than 18 years hospitalised with a  
9 main or associated diagnosis of HIV infection (ICD-10 code B20-24, Z21) were eligible. All  
10 patients with at least one hospitalisation lasting more than 24 hours were included. Those  
11 hospitalised for less than 24 hours were excluded since repeated short hospitalisations were  
12 most often regular follow-up consultations or ambulatory care. Age, sex, comorbidities and  
13 patient outcomes in the year following hospitalisation were collected. Each patient was  
14 classified as having past or present AIDS-defining illness (Centers for Disease Control (CDC)  
15 Stage C, codes B20-22, B241) or being HIV infected without progression to AIDS (CDC stages  
16 A and B, codes B23, B240, B249, and Z21). Hospital admissions with a main diagnosis code  
17 corresponding to KD (ICD-10 codes N00 to N39) in the year following the first hospitalisation  
18 with a diagnosis of HIV infection were collected. The KDs were defined and classified as  
19 follows: acute renal failure (codes N17 and 19), chronic KD either at first diagnosis or with  
20 associated complications, acute renal failure (code N18), nephrolithiasis (codes N13, 20, 21,  
21 22 and 23), pyelonephritis (codes N10, 11, 12 and 15), renal parenchymal diseases (including  
22 glomerular and tubular diseases) (codes N01-06, N08, N14, N16 and N25), and other KD  
23 (codes N26, 27, 28, 29 and N39). For glomerular diseases, both the syndrome (e.g. nephrotic  
24 syndrome) and the related disease (e.g. membranous nephropathy) were available. The  
25 identified syndromes were haematuria, proteinuria, nephrotic syndrome, and acute or  
26 chronic nephritic syndrome. Comorbidities were also collected: hypertension (codes I10-I15),  
27 diabetes mellitus (codes E10-E14), dyslipidaemia (code E78), heart failure (code I50),  
28 coinfection with hepatitis B and / or hepatitis C (codes B18.0 and B18.2), obesity (code E66),  
29 and cardiovascular diseases including coronary artery disease (codes I20-I25), peripheral  
30 artery disease (code I702) and stroke (codes I63, I64). The annual prevalence of  
31 hospitalisation due to KD among PLHIV and the annual distribution of the various KD were  
32 then assessed. The changes in annual prevalence were determined for the study period  
33 (2008-2013).  
34  
35  
36  
37  
38  
39  
40  
41  
42  
43  
44  
45  
46  
47  
48  
49  
50  
51  
52  
53  
54

55  
56 In the second part of the study which aimed to assess the incidence of hospital  
57 admission due to KD in PLHIV, only PLHIV newly followed in 2009 were taken into account,  
58 whatever the duration of their first hospitalisation. Newly followed PLHIV were defined as  
59  
60



1  
2  
3 patients hospitalised with a diagnosis of HIV infection in 2009 but with no hospitalisation for  
4 HIV infection in the previous two years. We considered these patients as “newly followed  
5 PLHIV” because very few HIV patients in France had medical follow up outside the hospital  
6 setting during the study period. The newly followed PLHIV were monitored for five years,  
7 and all hospitalisations for KD were analysed along with any associated co-morbidities.  
8  
9  
10  
11  
12

13 Changes over time in the proportion of PLHIV with KD were assessed using the  
14 Cochran Armitage Test, and changes in the number of patients in the HIV and KD cohorts  
15 were analysed with a Poisson model. We compared patient age in the AIDS defining-illness,  
16 non-AIDS HIV and the whole HIV cohorts with the t test, Mann Whitney test or Kruskal  
17 Wallis test. The characteristics of patients with and without AIDS were compared using  
18 Fisher’s exact test and the chi-square test. Multivariable logistic regression and a Cox model  
19 were used to determine factors associated with a hospitalisation for incident KD. SAS  
20 statistical software (version 9.3) was used for all analyses.  
21  
22  
23  
24  
25  
26  
27  
28  
29  
30  
31  
32  
33  
34  
35  
36  
37  
38  
39  
40  
41  
42  
43  
44  
45  
46  
47  
48  
49  
50  
51  
52  
53  
54  
55  
56  
57  
58  
59  
60

## Results

### Patient characteristics

From 2008 to 2013, more than 5 million people were hospitalised each year in France. Their main characteristics over the study period are shown in **Table 1**. The proportion of patients hospitalized for KD rose progressively from 1.9% in 2008 to 2.4% in 2013 ( $p < 0.01$ ).

During the same period, an average of 10,862 PLHIV were hospitalised per year (**Table 2**). There was a significant decrease in the number of PLHIV admissions from 2010 to 2013 ( $P < 0.01$ ). There was also a significant increase in the mean age of these patients, from 45 years in 2008 to 48 years in 2013 ( $P < 0.01$ ).

The comorbidities known to be associated with an increased risk of KD in 2009 are presented in **Table 3**. Hepatic comorbidities were more frequently observed in hospitalised PLHIV (12.2% vs 0.3%), whereas all other comorbidities were more frequent in the general hospitalised population.

### The distribution of hospitalisations for KD in PLHIV

Of the HIV infected patients admitted to hospital, 2,254 (3.5%) were hospitalised for at least 24 hours for KD during the 5-year study period (**Table 2**). A significant increase was observed over time, from 3.0% in 2008 to 3.7% in 2013 ( $P < 0.01$ ). The HIV patients hospitalised for KD were significantly older than the overall HIV cohort (50 +/- 13 years vs 46 +/- 12 years,  $P < 0.01$ ).

The most common KDs upon admission were ARF (25.4%, [23.0-30.1%]), nephrolithiasis (22.1%, [20.2-24.0%]) and pyelonephritis (22.1%, [15.9-26.8%]). The yearly proportion of patients hospitalised for ARF varied from 0.7% ( $n=77$ ) to 1.0% ( $n=101$ ) (0.9% on average, **Table 2**). Among hospitalisations for KD, the proportion of those linked to ARF remained stable over the study period (25.4% [23.0-30.1%]). The mean age of patients hospitalised with ARF was higher than the mean age of the whole cohort (51 +/- 13 years vs 46 +/- 12 years,  $P < 0.01$ ). Hospitalisation for ARF was more often observed in AIDS patients than in PLHIV without AIDS (30.1% vs 21.2%,  $P < 0.01$ ), the latter being older than the former

1  
2  
3 (55+/- 12 years vs 49+/- 12,  $P < 0.01$ ). Hospitalisation for pyelonephritis was more common  
4  
5 in AIDS patients, while the opposite was observed for nephrolithiasis  
6

7 Other causes of hospitalisation for KD were renal parenchymal diseases (8.6%, [5.9-  
8 11.4%]), out of these glomerular diseases (6.4% of the hospitalisations for KD), with a  
9 roughly stable proportion throughout the study period. Of these glomerular diseases, 27%  
10 (n=48) were defined only by their glomerular syndrome, 25.2% (n=45) were defined via their  
11 association with another disease (such as infectious diseases, systemic disease and diabetes  
12 mellitus), and only 47.8% (n=85) were histologically assessed. The proportion of renal  
13 biopsies in AIDS PLHIV was similar to that in non-AIDS PLHIV (45.5% vs 37.6%,  $P=0.39$ ). Of the  
14 histologically assessed glomerular diseases, FSGS was diagnosed in 37.6% of cases. While  
15 there was a non-significant upwards trend in the use of renal biopsy over the study period,  
16 the proportion of FSGS declined from 63.6% in 2008 to 27.3% in 2013. Other glomerular  
17 diseases were membranous nephropathy (14.1%, n=12), crescentic glomerulonephritis  
18 (12.9%, n=11), undetermined glomerulonephritis (10.6%, n=9), minimal change disease  
19 (9.4%, n=8) and membranoproliferative glomerulonephritis (7.1%, n=6). Mesangial  
20 proliferative glomerulonephritis and post-infectious glomerulonephritis were found in less  
21 than 5%. Tubulointerstitial disorders were infrequent (2.2%, n=49), decreasing from 3.3% in  
22 2008 to 1% in 2013 ( $P=0.18$ ). Drug-related tubulointerstitial or tubular injuries were the main  
23 cause of these hospitalisations (53.1%, n= 26).  
24  
25  
26  
27  
28  
29  
30  
31  
32  
33  
34  
35  
36  
37  
38

### 39 **Hospitalisations for KD in PLHIV newly followed in 2009**

40  
41 In 2009, 1113 PLHIV were newly followed, 66 of which were hospitalised for KD  
42 during the entire follow-up, which reveals a 5-year cumulative incidence of 5.9% (**Figure 1**).  
43 Twenty-two (33.0%) of these patients were coded for KD at the initial hospitalisation or  
44 within one year.  
45  
46  
47  
48

49 Comorbidities in all newly followed PLHIV and in those hospitalised for KD are  
50 summarised in **Table 4**. In logistic analysis, factors associated with a higher risk of KD were  
51 age (OR = 1.02 [1.00-1.04]) and cardiovascular disease (OR=3.71 [1.18-11.67]). AIDS PLHIV  
52 was also associated in female patients (OR = 3.67 [1.26-10.70]). In survival analysis,  
53 cardiovascular disease remained significantly associated with the risk of KD (HR=3.39 [1.22-  
54  
55  
56  
57  
58  
59  
60

1  
2  
3 9.42]). When focusing on female gender, AIDS PLHIV was also associated with this risk of KD  
4  
5 (HR = 3.67 [1.26-10.70]).  
6  
7

8           Among the causes of incident KD requiring hospital admission, ARF was involved in 25  
9 cases, and 66.7% of these occurred in the first two years of follow-up (50.0% in the first year  
10 and 16.7% in the second year). The 5-year cumulative incidence of ARF was 1.6%. No risk  
11 factor was significantly associated with the development of incident ARF requiring  
12 hospitalisation.  
13  
14  
15  
16  
17  
18  
19  
20  
21  
22  
23  
24  
25  
26  
27  
28  
29  
30  
31  
32  
33  
34  
35  
36  
37  
38  
39  
40  
41  
42  
43  
44  
45  
46  
47  
48  
49  
50  
51  
52  
53  
54  
55  
56  
57  
58  
59  
60

For peer review only

## Discussion

1  
2  
3  
4  
5  
6 Firstly, this study found that patients hospitalised for KD are 1.5 more frequent in  
7 PLHIV than in the general population. The rate of patients hospitalised increased steadily  
8 over time despite the fact that risk factors for KD are less frequent in PLHIV than in the  
9 general hospitalised population, except for hepatitis coinfections. These rates have  
10 increased significantly in recent years (from 3.0% in 2008 to 3.7% in 2013), albeit similar to  
11 the rates observed in the general population (5-year difference 0.7% vs 0.5%). ARF,  
12 nephrolithiasis and pyelonephritis accounted for more than three-quarters of hospital  
13 admissions for KD in our study. Glomerular or tubular diseases were rather infrequent but  
14 stable causes of hospitalisation. The most frequent glomerular disease was FSGS with 37.6%  
15 of histological codes, albeit with a downward trend since the beginning of the HAART era.

16  
17  
18  
19  
20  
21  
22  
23  
24  
25 Another point is that ARF often occurs within 2 years following the diagnosis of HIV  
26 for the two-thirds of the newly diagnosed and followed PLHIV who subsequently presented  
27 ARF.  
28  
29

30  
31  
32  
33  
34  
35  
36  
37  
38  
39  
40  
41  
42  
43  
44  
45  
46  
47  
48  
49  
50  
51  
52  
53  
54  
55  
56  
57  
58  
59  
60  
The last key finding is that nearly 6% of PLHIV were hospitalised for KD during the 5  
years following the diagnosis of HIV infection, and that the risk was strongly associated with  
the presence of cardiovascular disease.

To our knowledge, this study is the first to focus on hospital admissions for KD in a  
large population of PLHIV. In our study, more than 10,850 PLHIV were hospitalised each  
year, i.e. about 10% of the estimated cohort of 110,900 PLHIV medically followed-up in 2010  
in France. The exhaustive nature of our data ensures that the results are representative of all  
hospitalisations for KD in France, which is particularly important for both HIV and kidney  
disease which can be influenced by the ethnic origins of the population

This study is the first to show such a trend in a nationwide setting, and is consistent  
with other studies that have reported hospitalisations rates for KD ranging from 2.6% to  
3.3%<sup>19</sup>.

The proportion of FSGS at the beginning of our study (63.6% in 2008) is similar to  
that reported in other studies<sup>13 20 21</sup>, and the trend towards a decrease in the percentage we  
observed (27.3% in 2013) was also reported in another recent study (28%)<sup>22</sup>.

1  
2  
3 ARF was responsible for approximately 1% of in hospitalised PLHIV, a rate which is  
4 lower than that observed in the few previous studies focusing on PLHIV (2.8 to 5.9 per 100  
5 patient years<sup>3 4 23</sup>. The most likely explanation is that we only considered ARF cases leading  
6 to hospitalisation, and not all ARF, including those occurring in inpatients hospitalised for  
7 other reasons (e.g. sepsis or volume depletion). For example, 31% (34/111) of patients in the  
8 study by Franceschini *et al.* developed ARF during a hospital stay, and 38% had community-  
9 acquired ARF not requiring hospitalisation<sup>24</sup>. Furthermore, we also did not consider ARF in  
10 PLHIV hospitalised for CKD. This also probably explains why many studies reported ARF  
11 hospitalisation rates that were 3 or 4 times higher in PLHIV than in the general population,  
12 whereas we observed an ARF hospitalisation rate in PLHIV close to that observed in the  
13 general population (0.6 to 1%)<sup>25 26</sup>. Nonetheless, ARF remains a concern in PLHIV as the  
14 average age at the time of hospitalisation is lower than that in the general population.  
15  
16  
17  
18  
19  
20  
21  
22  
23  
24  
25

26 Our study has several limitations, the main one being the use of administrative codes.  
27 However, these codes are based on the clinical judgment of physicians and laboratory  
28 values. The use of this type of database has been validated for KD<sup>27 28</sup> and particularly for  
29 ARF<sup>27 28</sup>. In addition, the infrequent use of renal biopsies precluded an extended analysis of  
30 parenchymal KD leading to hospitalisation, and we do not distinguish HIVAN from HIVICK.  
31 Finally, it was not possible to provide accurate characteristics of the HIV infection in the  
32 absence of data on HIV viral load or CD4 cell count, and/or on the antiretroviral drugs used.  
33 Nonetheless, the aim of our study was to provide an overview of kidney disease in PLHIV.  
34 Other studies are necessary to extend the available data about each kidney condition in  
35 PLHIV.  
36  
37  
38  
39  
40  
41  
42  
43  
44

45 FSGS, which is probably represented by HIVAN, is still the most frequent nephropathy  
46 in PLHIV though it has decreased relative to other glomerulopathies following the expansion  
47 of HAART (13,15). Nevertheless, nearly 60% of our PLHIV cohort hospitalised for glomerular  
48 disease were not biopsied. Almost 50% of these patients had proteinuria or nephrotic  
49 syndrome (3.4% and 44.4%, respectively). These figures reveal a gap between the proportion  
50 of glomerular diseases and the number of renal biopsies performed. Several studies have  
51 confirmed the importance of performing kidney biopsies in PLHIV<sup>22 29</sup>. Radiological  
52 examinations, urinary findings, renal function biological and proteinuria evaluations do not  
53 provide sufficiently specific information to diagnose HIV-related nephropathy<sup>29 30</sup>. Much like  
54  
55  
56  
57  
58  
59  
60

1  
2  
3 U.S. guidelines from 2014 <sup>4</sup>, the French guidelines <sup>31</sup> recommend referring patients to a  
4 nephrologist if the eGFR falls to less than 60 ml/min and/or as soon as proteinuria appears.  
5  
6 The U.S. recommendations also suggest that biopsies should be done in HIV-infected  
7 patients in whom a definitive diagnosis may affect management or inform the prognosis <sup>4</sup>.  
8  
9

10  
11 ARF often occurs early during follow-up <sup>32 33</sup> with a 10-fold higher rate of ARF in the  
12 first 3 months after the introduction of HAART <sup>32</sup>, probably reflecting the disease burden in  
13 PLHIV with more advanced HIV disease and concurrent infections at the time of admission <sup>32</sup>  
14  
15 <sup>33</sup>. Indeed, opportunistic infections may play an important role in the development of early  
16 onset ARF.  
17  
18  
19

20  
21 By contrast, associated comorbidities and HAART toxicity are important factors  
22 leading to "late-onset ARF" <sup>32</sup>, as suggested by the older age of non-AIDS PLHIV experiencing  
23 ARF. This can probably be explained by the pathophysiological link between some  
24 comorbidities such as cardiovascular diseases and KD, that has also been reported in PLHIV <sup>34-</sup>  
25  
26 <sup>36</sup>. Since cardiovascular comorbidity is particularly frequent in PLHIV <sup>37</sup>, it should be closely  
27 monitored and managed to prevent serious KD.  
28  
29  
30  
31

32  
33 In conclusion, the proportion of PLHIV hospitalised for ARF and other types of KD  
34 remains significant and has not decreased despite the increasing use of HAART. PLHIV must  
35 be considered a high-risk population for KD, particularly for those with simultaneous  
36 cardiovascular disease. ARF remains the leading cause of hospitalisation for renal disorders,  
37 which essentially occur early during the follow-up, suggesting the need for regular and  
38 specific follow-up, at least during the first year. Glomerular and tubular diseases, which were  
39 also stable over time, should be documented more often by biopsies, whose results can  
40 inform the clinicians who treat these diseases, and improve prognostic outcomes. All of  
41 these data reflect changes in the impact of HIV infection, comorbidities and treatments, and  
42 underline the need to regularly address this issue in the future.  
43  
44  
45  
46  
47  
48  
49  
50  
51  
52  
53  
54  
55  
56  
57  
58  
59  
60

## References

1. Selik RM, Byers RH, Jr., Dworkin MS. Trends in diseases reported on U.S. death certificates that mentioned HIV infection, 1987-1999. *J Acquir Immune Defic Syndr* 2002;29(4):378-87.
2. Adih WK, Selik RM, Hu X. Trends in Diseases Reported on US Death Certificates That Mentioned HIV Infection, 1996-2006. *J Int Assoc Physicians AIDS Care (Chic)* 2011;10(1):5-11. doi: 10.1177/1545109710384505
3. Wyatt CM, Arons RR, Klotman PE, et al. Acute renal failure in hospitalized patients with HIV: risk factors and impact on in-hospital mortality. *AIDS* 2006;20(4):561-5. doi: 10.1097/01.aids.0000210610.52836.07
4. Lucas GM, Ross MJ, Stock PG, et al. Clinical practice guideline for the management of chronic kidney disease in patients infected with HIV: 2014 update by the HIV Medicine Association of the Infectious Diseases Society of America. *Clin Infect Dis* 2014;59(9):e96-138. doi: 10.1093/cid/ciu617
5. Li Y, Shlipak MG, Grunfeld C, et al. Incidence and risk factors for acute kidney injury in HIV Infection. *Am J Nephrol* 2012;35(4):327-34. doi: 10.1159/000337151
6. Choi AI, Li Y, Parikh C, et al. Long-term clinical consequences of acute kidney injury in the HIV-infected. *Kidney Int* 2010;78(5):478-85. doi: 10.1038/ki.2010.171
7. Hsu CY, Chertow GM, McCulloch CE, et al. Nonrecovery of kidney function and death after acute on chronic renal failure. *Clin J Am Soc Nephrol* 2009;4(5):891-8. doi: 10.2215/CJN.05571008
8. Lattanzio MR, Kopyt NP. Acute kidney injury: new concepts in definition, diagnosis, pathophysiology, and treatment. *J Am Osteopath Assoc* 2009;109(1):13-9.
9. Lucas GM, Mehta SH, Atta MG, et al. End-stage renal disease and chronic kidney disease in a cohort of African-American HIV-infected and at-risk HIV-seronegative participants followed between 1988 and 2004. *AIDS* 2007;21(18):2435-43. doi: 10.1097/QAD.0b013e32827038ad
10. Mocroft A, Lundgren JD, Ross M, et al. Cumulative and current exposure to potentially nephrotoxic antiretrovirals and development of chronic kidney disease in HIV-positive individuals with a normal baseline estimated glomerular filtration rate: a prospective international cohort study. *Lancet HIV* 2016;3(1):e23-32. doi: 10.1016/S2352-3018(15)00211-8
11. Deti EK, Thiebaut R, Bonnet F, et al. Prevalence and factors associated with renal impairment in HIV-infected patients, ANRS C03 Aquitaine Cohort, France. *HIV Med* 2010;11(5):308-17. doi: 10.1111/j.1468-1293.2009.00780.x
12. Wali RK, Drachenberg CI, Papadimitriou JC, et al. HIV-1-associated nephropathy and response to highly-active antiretroviral therapy. *Lancet* 1998;352(9130):783-4. doi: 10.1016/S0140-6736(98)24037-2
13. Lescure FX, Fleteau C, Pacanowski J, et al. HIV-associated kidney glomerular diseases: changes with time and HAART. *Nephrol Dial Transplant* 2012;27(6):2349-55. doi: 10.1093/ndt/gfr676
14. Flandre P, Pugliese P, Cuzin L, et al. Risk factors of chronic kidney disease in HIV-infected patients. *Clin J Am Soc Nephrol* 2011;6(7):1700-7. doi: 10.2215/CJN.09191010



15. Pages PB, Cottenet J, Mariet AS, et al. In-hospital mortality following lung cancer resection: nationwide administrative database. *Eur Respir J* 2016;47(6):1809-17. doi: 10.1183/13993003.00052-2016
16. Creuzot-Garcher C, Benzenine E, Mariet AS, et al. Incidence of Acute Postoperative Endophthalmitis after Cataract Surgery: A Nationwide Study in France from 2005 to 2014. *Ophthalmology* 2016;123(7):1414-20. doi: 10.1016/j.ophtha.2016.02.019
17. Abdulmalak C, Cottenet J, Beltramo G, et al. Haemoptysis in adults: a 5-year study using the French nationwide hospital administrative database. *Eur Respir J* 2015;46(2):503-11. doi: 10.1183/09031936.00218214
18. Quantin C, Benzenine E, Velten M, et al. Self-controlled case series and misclassification bias induced by case selection from administrative hospital databases: application to febrile convulsions in pediatric vaccine pharmacoepidemiology. *Am J Epidemiol* 2013;178(12):1731-9. doi: 10.1093/aje/kwt207
19. Crum-Cianflone NF, Grandits G, Echols S, et al. Trends and causes of hospitalizations among HIV-infected persons during the late HAART era: what is the impact of CD4 counts and HAART use? *J Acquir Immune Defic Syndr* 2010;54(3):248-57.
20. Berliner AR, Fine DM, Lucas GM, et al. Observations on a cohort of HIV-infected patients undergoing native renal biopsy. *Am J Nephrol* 2008;28(3):478-86. doi: 10.1159/000112851
21. Bohmart A, Burns G. Renal disease in an urban HIV population in the era prior and following the introduction of highly active antiretroviral therapy. *J Natl Med Assoc* 2011;103(6):513-7.
22. da Silva DR, Gluz IC, Kurz J, et al. Multiple facets of HIV-associated renal disease. *Braz J Med Biol Res* 2016;49(4):e5176. doi: 10.1590/1414-431X20165176
23. Ibrahim F, Naftalin C, Cheserem E, et al. Immunodeficiency and renal impairment are risk factors for HIV-associated acute renal failure. *AIDS* 2010;24(14):2239-44. doi: 10.1097/QAD.0b013e32833c85d6
24. Franceschini N, Napravnik S, Eron JJ, Jr., et al. Incidence and etiology of acute renal failure among ambulatory HIV-infected patients. *Kidney Int* 2005;67(4):1526-31. doi: 10.1111/j.1523-1755.2005.00232.x
25. Schissler MM, Zaidi S, Kumar H, et al. Characteristics and outcomes in community-acquired versus hospital-acquired acute kidney injury. *Nephrology (Carlton)* 2013;18(3):183-7. doi: 10.1111/nep.12036
26. Mesropian PD, Othersen J, Mason D, et al. Community-acquired acute kidney injury: A challenge and opportunity for primary care in kidney health. *Nephrology (Carlton)* 2016;21(9):729-35. doi: 10.1111/nep.12751
27. Vlasschaert ME, Bejaimal SA, Hackam DG, et al. Validity of administrative database coding for kidney disease: a systematic review. *Am J Kidney Dis* 2011;57(1):29-43. doi: 10.1053/j.ajkd.2010.08.031
28. Waikar SS, Wald R, Chertow GM, et al. Validity of International Classification of Diseases, Ninth Revision, Clinical Modification Codes for Acute Renal Failure. *J Am Soc Nephrol* 2006;17(6):1688-94. doi: 10.1681/ASN.2006010073
29. Cohen SD, Kimmel PL. Renal biopsy is necessary for the diagnosis of HIV-associated renal diseases. *Nat Clin Pract Nephrol* 2009;5(1):22-3. doi: 10.1038/ncpneph0990
30. Fine DM, Perazella MA, Lucas GM, et al. Kidney biopsy in HIV: beyond HIV-associated nephropathy. *Am J Kidney Dis* 2008;51(3):504-14. doi: 10.1053/j.ajkd.2007.12.005

- 1  
2  
3 31. Morlat P. Prise en charge médicale des personnes vivant avec le VIH :  
4 recommandations du groupe d'experts : rapport 2013. Paris: Direction de  
5 l'information légale et administrative 2013.  
6  
7 32. Roe J, Campbell LJ, Ibrahim F, et al. HIV care and the incidence of acute renal failure.  
8 *Clin Infect Dis* 2008;47(2):242-9. doi: 10.1086/589296  
9  
10 33. Naicker S, Aboud O, Gharbi MB. Epidemiology of acute kidney injury in Africa. *Semin*  
11 *Nephrol* 2008;28(4):348-53. doi: 10.1016/j.semnephrol.2008.04.003  
12  
13 34. Roy SK, Estrella MM, Darilay AT, et al. Glomerular filtration rate and proteinuria  
14 associations with coronary artery calcium among HIV-infected and HIV-uninfected  
15 men in the Multicenter AIDS Cohort Study. *Coron Artery Dis* 2017;28(1):17-22. doi:  
16 10.1097/MCA.0000000000000428  
17  
18 35. Ryom L, Mocroft A, Kirk O, et al. Predictors of advanced chronic kidney disease and  
19 end-stage renal disease in HIV-positive persons. *AIDS* 2014;28(2):187-99. doi:  
20 10.1097/QAD.0000000000000042  
21  
22 36. Ryom L, Lundgren JD, Ross M, et al. Renal Impairment and Cardiovascular Disease in  
23 HIV-Positive Individuals: The D:A:D Study. *J Infect Dis* 2016;214(8):1212-20. doi:  
24 10.1093/infdis/jiw342  
25  
26 37. Hanna DB, Ramaswamy C, Kaplan RC, et al. Trends in Cardiovascular Disease  
27 Mortality Among Persons With HIV in New York City, 2001-2012. *Clin Infect Dis*  
28 2016;63(8):1122-9. doi: 10.1093/cid/ciw470  
29  
30  
31  
32  
33  
34  
35  
36  
37  
38  
39  
40  
41  
42  
43  
44  
45  
46  
47  
48  
49  
50  
51  
52  
53  
54  
55  
56  
57  
58  
59  
60

**Table 1: General patient population characteristics and distribution of KD and ARF hospital admissions, per year**

| General population                                                                                          | 2008          | 2009          | 2010          | 2011          | 2012          | 2013          | Mean          |
|-------------------------------------------------------------------------------------------------------------|---------------|---------------|---------------|---------------|---------------|---------------|---------------|
| <b>Number of patients hospitalised (n, all causes)</b>                                                      | 5287364       | 5232412       | 5170695       | 5193430       | 5217264       | 5163969       | 5210856       |
| <b>Sex ratio (M/F)</b>                                                                                      | 47.3% / 52.7% | 48.1% / 51.9% | 48.0% / 52.0% | 47.9% / 52.1% | 47.7% / 52.3% | 47.8% / 52.2% | 47.8% / 52.2% |
| <b>Age (mean, years)</b>                                                                                    | 59 +/- 20     | 59 +/- 20     | 60 +/- 20     | 60 +/- 20     | 60 +/- 20     | 61 +/- 20     | 60 +/- 20     |
| <b>Number of patients hospitalised (for more than 24 hours for kidney disease, n, % general population)</b> | 102420 (1.9%) | 106853 (2.0%) | 109931 (2.1%) | 113492 (2.2%) | 118000 (2.3%) | 122515 (2.4%) | 112202 (2.2%) |
| <b>Sex ratio (M/F)</b>                                                                                      | 53.0% / 47.0% | 52.9% / 47.1% | 52.7% / 47.3% | 52.7% / 47.3% | 52.6% / 47.4% | 52.4% / 47.6% | 52.7%/47.3%   |
| <b>Age (mean, years)</b>                                                                                    | 64 +/- 18     | 64 +/- 18     | 65 +/- 18     | 65 +/- 18     | 65 +/- 18     | 66 +/- 18     | 65 +/- 18     |
| <b>Number of patients hospitalised (for more than 24 hours for ARF, n, % of general population)</b>         | 15993 (0.3%)  | 17473 (0.3%)  | 16567 (0.3%)  | 16491 (0.3%)  | 17082 (0.3%)  | 17478 (0.3%)  | 16847 (0.3%)  |
| <b>Sex ratio (M/F)</b>                                                                                      | 59.2% / 40.8% | 58.5% / 41.5% | 59.6% / 40.4% | 59.2% / 40.8% | 59.4% / 40.6% | 59.6% / 40.4% | 59.3%/40.7%   |
| <b>Age (mean, years)</b>                                                                                    | 71 +/- 15     | 71 +/- 15     | 71 +/- 15     | 71 +/- 15     | 71 +/- 14     | 71 +/- 15     | 71 +/- 15     |

**Table 2:** General characteristics of PLHIV and distribution of KD and ARF hospitalisations, per year

| People living with HIV                                                                                            | 2008          | 2009          | 2010          | 2011          | 2012          | 2013          | Mean                 |
|-------------------------------------------------------------------------------------------------------------------|---------------|---------------|---------------|---------------|---------------|---------------|----------------------|
| <b>Number of patients hospitalised (n, all causes)</b>                                                            | 10 878        | 11 418        | 11226         | 10 638        | 10 568        | 10 445        | <b>10 862</b>        |
| <b>Sex ratio (M/F)</b>                                                                                            | 61.3% / 38.7% | 61.1% / 38.9% | 60.9% / 39.1% | 62.0% / 38.0% | 61.7% / 38.3% | 62.5% / 36.5% | <b>61.6% / 38.4%</b> |
| <b>Age (mean, years)</b>                                                                                          | 45 +/- 12     | 45 +/- 12     | 46 +/- 12     | 47 +/- 12     | 47 +/- 12     | 48 +/- 13     | <b>46+/-12</b>       |
| <b>AIDS-defining illness stage (n, %)</b>                                                                         | 4204 (38.6%)  | 4302 (37.7%)  | 4403 (39.2%)  | 4005 (37.6%)  | 3865 (36.6%)  | 3692 (35.3%)  | <b>4124 (37.5%)</b>  |
| <b>Number of patients hospitalised (longer than 24 hours for KD, n, % of hospitalised HIV positive patients)</b>  | 330 (3.0%)    | 396 (3.5%)    | 365 (3.3%)    | 378 (3.6%)    | 396 (3.7%)    | 389 (3.7%)    | <b>376 (3.5%)</b>    |
| <b>Sex ratio (M/F)</b>                                                                                            | 60.6% / 39.4% | 61.4% / 38.6% | 65.2% / 34.8% | 62.2% / 37.8% | 58.6% / 41.4% | 60.7% / 39.3% | <b>61.4% / 38.6%</b> |
| <b>Age (mean, years)</b>                                                                                          | 48 +/- 12     | 50 +/- 13     | 51 +/- 13     | 49 +/- 13     | 52 +/- 13     | 52 +/- 13     | <b>50+/-13</b>       |
| <b>AIDS-defining illness stage (n, %)</b>                                                                         | 159 (48.2%)   | 178 (44.9%)   | 180 (49.3%)   | 184 (48.7%)   | 178 (44.9%)   | 180 (46.3%)   | <b>177 (47.0%)</b>   |
| <b>Number of patients hospitalised (longer than 24 hours for ARF, n, % of hospitalised HIV positive patients)</b> | 77 (0.7%)     | 105 (0.9%)    | 110 (1.0%)    | 87 (0.8%)     | 92 (0.9%)     | 101 (1.0%)    | <b>95 (0.9%)</b>     |
| <b>Sex ratio (M/F)</b>                                                                                            | 74.0% / 26.0% | 70.5% / 29.5% | 71.8% / 28.2% | 71.3% / 28.7% | 80.4% / 19.6% | 74.3% / 25.7% | <b>73.6%/26.4%</b>   |
| <b>Age (mean, years)</b>                                                                                          | 48 +/- 11     | 50 +/- 13     | 50 +/-12      | 50 +/- 12     | 55 +/- 12     | 55 +/- 13     | <b>51+/- 13</b>      |
| <b>AIDS-defining illness stage (n, %)</b>                                                                         | 41 (53.2%)    | 57 (54.3%)    | 64 (58.2%)    | 53 (60.9%)    | 46 (50.0%)    | 58 (57.4%)    | <b>53 (55.8%)</b>    |

**Table 3: Comorbidities in the hospitalised general population and hospitalised HIV population for the year 2009**

| Comorbidities                   | General population | HIV          | p-value |
|---------------------------------|--------------------|--------------|---------|
|                                 | n=5232412          | n=11418      |         |
| Hepatitis co-infections* , n, % | 16390 (0.3%)       | 1397 (12.2%) | <0.01   |
| Hypertension, n, %              | 1136018 (21.7%)    | 927 (8.1%)   | <0.01   |
| Diabetes mellitus, n, %         | 526511 ( 10.1%)    | 651 (5.7%)   | <0.01   |
| Cardiovascular diseases‡, n, %  | 683316 (13.1%)     | 821 (7.2%)   | <0.01   |
| Dyslipidaemia, n, %             | 375600 (7.2%)      | 425 (3.7%)   | <0.01   |
| Obesity, n, %                   | 282517 (5.4%)      | 229 (3.0%)   | <0.01   |
| Heart failure, n, %             | 218697 (4.2%)      | 151 (1.3%)   | <0.01   |

\*Hepatitis co-infections included hepatitis C and/or hepatitis B

‡ Cardiovascular diseases included coronary artery diseases, peripheral artery disease and stroke.

**Table 4:** Comorbidities in all newly followed PLHIV and in those hospitalised for KD

| Comorbidities                  | Total newly followed PLHIV<br>n=1113 | Newly followed PLHIV with KD<br>n=66 | P    |
|--------------------------------|--------------------------------------|--------------------------------------|------|
| Hepatitis co-infections , n, % | 89 (8.0%)                            | 4 (6.1%)                             | 0.55 |
| Hypertension, n, %             | 53 (4.8%)                            | 5 (7.6%)                             | 0.24 |
| Mellitus diabetes, n, %        | 37 (3.3%)                            | 2 (3.0%)                             | 1.00 |
| Cardiovascular diseases‡, n, % | 28 (2.5%)                            | 5 (7.6%)                             | 0.03 |
| Dyslipidaemia, n, %            | 11 (1.0%)                            | 1 (1.5%)                             | 0.49 |
| Obesity, n, %                  | 14 (1.3%)                            | 2 (3.0%)                             | 0.20 |
| Heart failure, n, %            | 5 (0.4%)                             | 1 (1.5%)                             | -    |

\*Hepatitis co-infections including hepatitis C and/or hepatitis B

‡ Cardiovascular diseases included coronary artery diseases, peripheral artery disease and stroke.

1  
2  
3  
4  
5  
6  
7 **Figure 1:** *Cumulative incidence of KD requiring hospitalisation for all newly followed PLHIV*  
8 *(grey curve), for those without past or present AIDS (light bars) and for those with past or*  
9 *present AIDS-defining illness (dark bars).*  
10  
11  
12  
13  
14  
15  
16  
17  
18  
19  
20  
21  
22  
23  
24  
25  
26  
27  
28  
29  
30  
31  
32  
33  
34  
35  
36  
37  
38  
39  
40  
41  
42  
43  
44  
45  
46  
47  
48  
49  
50  
51  
52  
53  
54  
55  
56  
57  
58  
59  
60

For peer review only

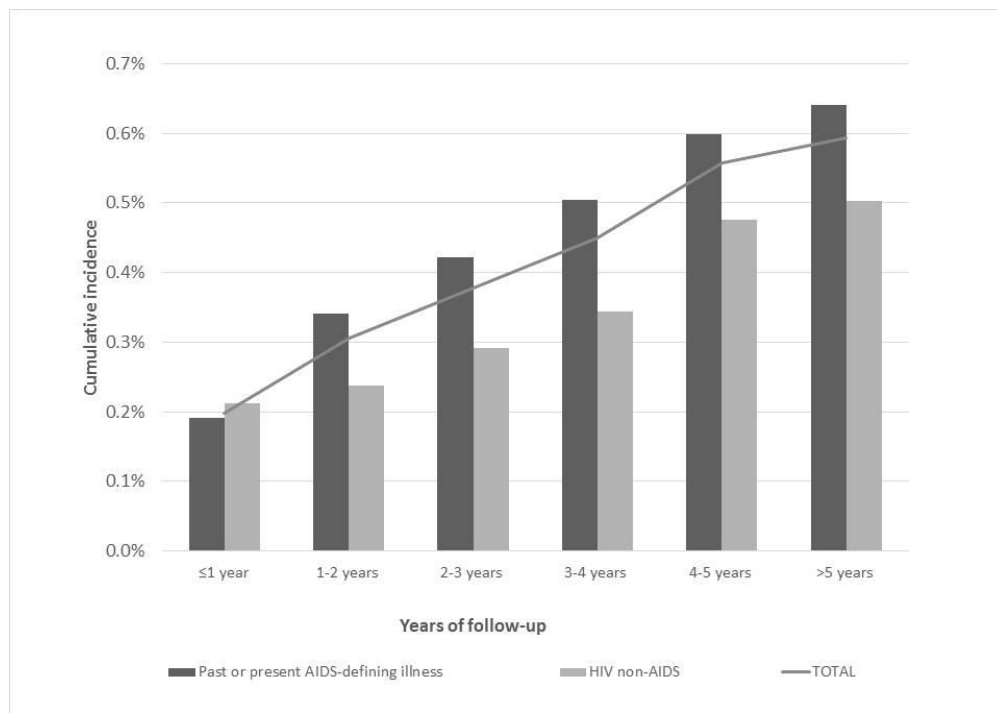

Figure 1: Cumulative incidence of KD requiring hospitalisation for all newly followed PLHIV (grey curve), for those without past or present AIDS (light bars) and for those with past or present AIDS-defining illness (dark bars).

81x60mm (300 x 300 DPI)



1  
2  
3  
4  
5  
6  
7  
8  
9  
10  
11  
12  
13  
14  
15  
16  
17  
18  
19  
20  
21  
22  
23  
24  
25  
26  
27  
28  
29  
30  
31  
32  
33  
34  
35  
36  
37  
38  
39  
40  
41  
42  
43  
44  
45  
46  
47  
48  
49  
50  
51  
52  
53  
54  
55  
56  
57  
58  
59  
60

## STROBE Statement—checklist of items that should be included in reports of observational studies

|                              | Item No | Recommendation                                                                                                                                                                                                                                                                                                                                                                                                                                                         | Page No |
|------------------------------|---------|------------------------------------------------------------------------------------------------------------------------------------------------------------------------------------------------------------------------------------------------------------------------------------------------------------------------------------------------------------------------------------------------------------------------------------------------------------------------|---------|
| <b>Title and abstract</b>    | 1       | (a) Indicate the study's design with a commonly used term in the title or the abstract                                                                                                                                                                                                                                                                                                                                                                                 | 1       |
|                              |         | (b) Provide in the abstract an informative and balanced summary of what was done and what was found                                                                                                                                                                                                                                                                                                                                                                    | 3       |
| <b>Introduction</b>          |         |                                                                                                                                                                                                                                                                                                                                                                                                                                                                        |         |
| Background/rationale         | 2       | Explain the scientific background and rationale for the investigation being reported                                                                                                                                                                                                                                                                                                                                                                                   | 5       |
| Objectives                   | 3       | State specific objectives, including any prespecified hypotheses                                                                                                                                                                                                                                                                                                                                                                                                       | 5       |
| <b>Methods</b>               |         |                                                                                                                                                                                                                                                                                                                                                                                                                                                                        |         |
| Study design                 | 4       | Present key elements of study design early in the paper                                                                                                                                                                                                                                                                                                                                                                                                                | 5       |
| Setting                      | 5       | Describe the setting, locations, and relevant dates, including periods of recruitment, exposure, follow-up, and data collection                                                                                                                                                                                                                                                                                                                                        | 5       |
| Participants                 | 6       | (a) <i>Cohort study</i> —Give the eligibility criteria, and the sources and methods of selection of participants. Describe methods of follow-up<br><i>Case-control study</i> —Give the eligibility criteria, and the sources and methods of case ascertainment and control selection. Give the rationale for the choice of cases and controls<br><i>Cross-sectional study</i> —Give the eligibility criteria, and the sources and methods of selection of participants | 5-6     |
|                              |         | (b) <i>Cohort study</i> —For matched studies, give matching criteria and number of exposed and unexposed<br><i>Case-control study</i> —For matched studies, give matching criteria and the number of controls per case                                                                                                                                                                                                                                                 | NA      |
| Variables                    | 7       | Clearly define all outcomes, exposures, predictors, potential confounders, and effect modifiers. Give diagnostic criteria, if applicable                                                                                                                                                                                                                                                                                                                               | 6       |
| Data sources/<br>measurement | 8*      | For each variable of interest, give sources of data and details of methods of assessment (measurement). Describe comparability of assessment methods if there is more than one group                                                                                                                                                                                                                                                                                   | 6       |
| Bias                         | 9       | Describe any efforts to address potential sources of bias                                                                                                                                                                                                                                                                                                                                                                                                              | 6-7     |
| Study size                   | 10      | Explain how the study size was arrived at                                                                                                                                                                                                                                                                                                                                                                                                                              | 6       |
| Quantitative variables       | 11      | Explain how quantitative variables were handled in the analyses. If applicable, describe which groupings were chosen and why                                                                                                                                                                                                                                                                                                                                           | 7       |
| Statistical methods          | 12      | (a) Describe all statistical methods, including those used to control for confounding                                                                                                                                                                                                                                                                                                                                                                                  | 7       |
|                              |         | (b) Describe any methods used to examine subgroups and interactions                                                                                                                                                                                                                                                                                                                                                                                                    | 7       |
|                              |         | (c) Explain how missing data were addressed                                                                                                                                                                                                                                                                                                                                                                                                                            | NA      |
|                              |         | (d) <i>Cohort study</i> —If applicable, explain how loss to follow-up was addressed<br><i>Case-control study</i> —If applicable, explain how matching of cases and controls was addressed<br><i>Cross-sectional study</i> —If applicable, describe analytical methods taking account of sampling strategy                                                                                                                                                              | NA      |
|                              |         | (e) Describe any sensitivity analyses                                                                                                                                                                                                                                                                                                                                                                                                                                  | NA      |

Continued on next page

| <b>Results</b>           |     |                                                                                                                                                                                                              |             |
|--------------------------|-----|--------------------------------------------------------------------------------------------------------------------------------------------------------------------------------------------------------------|-------------|
| 7Participants            | 13* | (a) Report numbers of individuals at each stage of study—eg numbers potentially eligible, examined for eligibility, confirmed eligible, included in the study, completing follow-up, and analysed            | 8           |
|                          |     | (b) Give reasons for non-participation at each stage                                                                                                                                                         | NA          |
|                          |     | (c) Consider use of a flow diagram                                                                                                                                                                           | NA          |
| Descriptive data         | 14* | (a) Give characteristics of study participants (eg demographic, clinical, social) and information on exposures and potential confounders                                                                     | 8           |
|                          |     | (b) Indicate number of participants with missing data for each variable of interest                                                                                                                          | NA          |
|                          |     | (c) <i>Cohort study</i> —Summarise follow-up time (eg, average and total amount)                                                                                                                             | 8           |
| Outcome data             | 15* | <i>Cohort study</i> —Report numbers of outcome events or summary measures over time                                                                                                                          | 9           |
|                          |     | <i>Case-control study</i> —Report numbers in each exposure category, or summary measures of exposure                                                                                                         | NA          |
|                          |     | <i>Cross-sectional study</i> —Report numbers of outcome events or summary measures                                                                                                                           | NA          |
| Main results             | 16  | (a) Give unadjusted estimates and, if applicable, confounder-adjusted estimates and their precision (eg, 95% confidence interval). Make clear which confounders were adjusted for and why they were included | 8-10-tables |
|                          |     | (b) Report category boundaries when continuous variables were categorized                                                                                                                                    | 8-10-tables |
|                          |     | (c) If relevant, consider translating estimates of relative risk into absolute risk for a meaningful time period                                                                                             | 8-10-tables |
| Other analyses           | 17  | Report other analyses done—eg analyses of subgroups and interactions, and sensitivity analyses                                                                                                               | 9-10        |
| <b>Discussion</b>        |     |                                                                                                                                                                                                              |             |
| Key results              | 18  | Summarise key results with reference to study objectives                                                                                                                                                     | 11          |
| Limitations              | 19  | Discuss limitations of the study, taking into account sources of potential bias or imprecision. Discuss both direction and magnitude of any potential bias                                                   | 11-12       |
| Interpretation           | 20  | Give a cautious overall interpretation of results considering objectives, limitations, multiplicity of analyses, results from similar studies, and other relevant evidence                                   | 12          |
| Generalisability         | 21  | Discuss the generalisability (external validity) of the study results                                                                                                                                        | 12-13       |
| <b>Other information</b> |     |                                                                                                                                                                                                              |             |
| Funding                  | 22  | Give the source of funding and the role of the funders for the present study and, if applicable, for the original study on which the present article is based                                                | 2           |

\*Give information separately for cases and controls in case-control studies and, if applicable, for exposed and unexposed groups in cohort and cross-sectional studies.

**Note:** An Explanation and Elaboration article discusses each checklist item and gives methodological background and published examples of transparent reporting. The STROBE checklist is best used in conjunction with this article (freely available on the Web sites of PLoS Medicine at <http://www.plosmedicine.org/>, Annals of Internal Medicine at <http://www.annals.org/>, and Epidemiology at <http://www.epidem.com/>). Information on the STROBE Initiative is available at [www.strobe-statement.org](http://www.strobe-statement.org).

# BMJ Open

## Prevalence and incidence of kidney diseases leading to hospital admission in people living with HIV in France: an observational nationwide study

|                                 |                                                                                                                                                                                                                                                                                                                                                                                                                                                                                                                                                                                                                                                                                                                                                                                                                                                    |
|---------------------------------|----------------------------------------------------------------------------------------------------------------------------------------------------------------------------------------------------------------------------------------------------------------------------------------------------------------------------------------------------------------------------------------------------------------------------------------------------------------------------------------------------------------------------------------------------------------------------------------------------------------------------------------------------------------------------------------------------------------------------------------------------------------------------------------------------------------------------------------------------|
| Journal:                        | <i>BMJ Open</i>                                                                                                                                                                                                                                                                                                                                                                                                                                                                                                                                                                                                                                                                                                                                                                                                                                    |
| Manuscript ID                   | bmjopen-2019-029211.R1                                                                                                                                                                                                                                                                                                                                                                                                                                                                                                                                                                                                                                                                                                                                                                                                                             |
| Article Type:                   | Research                                                                                                                                                                                                                                                                                                                                                                                                                                                                                                                                                                                                                                                                                                                                                                                                                                           |
| Date Submitted by the Author:   | 27-Mar-2019                                                                                                                                                                                                                                                                                                                                                                                                                                                                                                                                                                                                                                                                                                                                                                                                                                        |
| Complete List of Authors:       | louis, magali; CHU Dijon, infectious diseases<br>Cottenet, J; CHRU Dijon, Service de Biostatistique et d'Informatique Médicale (DIM), Dijon, F-21000, France ; Université de Bourgogne, Dijon, F-21000, France<br>salmon-rousseau, arnaud; CHU Dijon, infectious diseases<br>blot, mathieu; CHU Dijon, infectious diseases<br>bonnot, pierre-henri; CHU Dijon, infectious diseases<br>rebibou, jean-michel; CHU Dijon, infectious diseases<br>Chavanet, Pascal; CHRU de Dijon, Département d'infectiologie; Université de Bourgogne-Franche-Comté, Laboratoire microbiologie environnementale et risques sanitaires - UMR 1347<br>mousson, christiane; CHU Dijon, infectious diseases<br>Quantin, Catherine; CHRU Dijon, CHRU Dijon, Service de Biostatistique et d'Informatique Médicale (DIM),<br>piroth, lionel; CHU Dijon, infectious diseases |
| <b>Primary Subject Heading</b>: | HIV/AIDS                                                                                                                                                                                                                                                                                                                                                                                                                                                                                                                                                                                                                                                                                                                                                                                                                                           |
| Secondary Subject Heading:      | Pathology, Epidemiology                                                                                                                                                                                                                                                                                                                                                                                                                                                                                                                                                                                                                                                                                                                                                                                                                            |
| Keywords:                       | HIV, Nephrology < INTERNAL MEDICINE, Epidemiology < INFECTIOUS DISEASES                                                                                                                                                                                                                                                                                                                                                                                                                                                                                                                                                                                                                                                                                                                                                                            |
|                                 |                                                                                                                                                                                                                                                                                                                                                                                                                                                                                                                                                                                                                                                                                                                                                                                                                                                    |

SCHOLARONE™  
Manuscripts

1  
2  
3 **Prevalence and incidence of kidney diseases leading to hospital admission in people**  
4 **living with HIV in France: an observational nationwide study**  
5  
6  
7

8  
9 *Magali LOUIS*<sup>1,2</sup>, *Jonathan COTTENET*<sup>3</sup>, *Arnaud SALMON-ROUSSEAU*<sup>1</sup>, *Mathieu BLOT*<sup>1</sup>,  
10 *Pierre-Henri BONNOT*<sup>2</sup>, *Jean-Michel REBIBOU*<sup>2,4</sup>, *Pascal CHAVANET*<sup>1,5</sup>, *Christiane MOUSSON*  
11 <sup>2</sup>, *Catherine QUANTIN*<sup>3,5</sup>, *Lionel PIROTH*<sup>1,5</sup>  
12  
13  
14

15  
16 <sup>1</sup> *Département d'Infectiologie, CHU Dijon, France*

17 <sup>2</sup> *Service de Néphrologie, CHU Dijon, France*

18 <sup>3</sup> *Service de Biostatistiques et d'Informatique Médicale, CHU, et Université de Bourgogne, Dijon,*  
19 *France*

20 <sup>4</sup> *UMR 1098, Université de Bourgogne, Dijon, France*

21 <sup>5</sup> *INSERM, CIC 1432, Dijon, France*  
22  
23

24  
25 **Corresponding author:**  
26

27 Lionel Piroth

28 Infectious Diseases Department, CHU de Dijon

29 14 rue Gaffarel

30 21079 Dijon Cedex, France

31 Tel: 33 3 80 29 33 05

32 Fax: 33 3 80 29 36 38

33 E-mail: [lionel.piroth@chu-dijon.fr](mailto:lionel.piroth@chu-dijon.fr)  
34  
35  
36  
37

38 **Word count (abstract): 294 Word count (text): 3346 References : 40**  
39  
40  
41  
42  
43  
44  
45  
46  
47  
48  
49  
50  
51  
52  
53  
54  
55  
56  
57  
58  
59  
60

1  
2  
3 **Disclosure of interest:** The authors declare no conflict of interest in relation with this article.  
4  
5

6  
7 **Contributorship statement:** ML and LP conceptualised and designed the study, interpreted  
8 the data and wrote the paper. JC performed the data analysis. ASR and CM contributed  
9 substantially to writing the manuscript. MB PHB JMR and PC participated in the  
10 interpretation of the results and reviewed and revised the manuscript drafts. CQ oversaw  
11 the data analysis and interpretation and contributed substantially to writing the manuscript.  
12  
13 All authors accept responsibility for the paper as published.  
14  
15  
16

17  
18  
19 **Funding** This research did not receive any specific grant from funding agencies in the public,  
20 commercial or not-for-profit sectors.  
21  
22

23  
24  
25 **Competing interests** None declared.  
26  
27

28  
29 **Patient and Public Involvement** this study used an anonymized database, patients were thus  
30 not involved.  
31  
32

33  
34 **Ethics:** This study was approved by the National Committee for data protection (registration  
35 number 1576793) and therefore was conducted in accordance with the Declaration of  
36 Helsinki. Since this study used an anonymized database and that patients were not involved,  
37 written consent was not needed. The PMSI database was transmitted by the national agency  
38 for the management of hospitalization data (ATIH number 2015-111111-47-33).  
39  
40  
41  
42

43  
44  
45 **Provenance and peer review** Not commissioned; externally peer reviewed.  
46  
47

48  
49 **Data sharing statement** The PMSI database was transmitted by the national agency for the  
50 management of hospitalization data. The use of these data by our department was approved  
51 by the National Committee for data protection. We are not allowed to transmit these data.  
52  
53  
54  
55  
56  
57  
58  
59  
60

**Abstract (294 words)**

**Objectives:** To describe hospitalisations for kidney disease (KD) among persons living with HIV (PLHIV) in France and to identify the factors associated with such hospitalisations since data on the epidemiology of KD leading to hospitalisation are globally scarce.

**Design:** Observational nationwide study using the French PMSI (Programme de Médicalisation des Systèmes d'Information) database.

**Setting:** France 2008-2013

**Participants:** Around 10,862 PLHIV out of a mean of 5,210,856 patients hospitalised each year. All hospital admissions with a main diagnosis code indicating KD (ICD-10 codes N00 to N39) were collected.

**Main outcome measures:** The prevalence and incidence of KD leading to hospital admission in PLHIV and the associated risk factors..

**Results:** The prevalence of patients hospitalised for KD was 1.5 higher in PLHIV than in the general population, and increased significantly from 3.0% in 2008 to 3.7% in 2013 ( $P < 0.01$ ). The main cause of hospitalisation for KD was acute renal failure (ARF, 25.4%). Glomerular diseases remained stable (6.4%) throughout the study period, focal segmental glomerulosclerosis being the main diagnosis (37.6%). Only 41.3% of patients hospitalised for glomerular disease were biopsied. The other common motives for admission were nephrolithiasis (22.1%) and pyelonephritis (22.6%).

The 5-year cumulative incidence of KD requiring hospitalisation was 5.9% in HIV patients newly diagnosed for HIV in 2009. Factors associated with a higher risk of incident KD requiring hospitalisation were cardiovascular disease (HR=3.30, 1.46 to 7.49), and, for female patients, AIDS (HR=2.45, 1.07 to 5.58). Two thirds of hospitalisations for incident ARF occurred in the first two years of follow-up.

**Conclusions:** Hospital admission for KD is more frequent in PLHIV than in the general population and increases over time. ARF remains the leading cause. Glomerular diseases are infrequently documented by renal biopsies. Older patients and those with cardiovascular disease are particularly concerned.

### Strengths and limitations of this study

- This study is the first to focus on hospital admissions for kidney disease (KD) in a large population people living with HIV (PLHIV).
- The exhaustive nature of our data ensures that the results are representative of all hospitalisations for KD in France.
- The main limitation is the use of administrative codes, even though they are based on the clinical judgment of physicians and on laboratory values.
- It was also not possible to provide accurate characteristics of the HIV infection

**Keywords:** HIV; kidney disease; acute renal failure; glomerular disease; hospitalisation

## Introduction

In 2015, 36.9 million people around the world and about 130,000 in France were living with HIV. The introduction of highly active antiretroviral therapy (HAART) has dramatically decreased mortality and significantly improved the quality of life of people living with HIV (PLHIV). However, an increase in the incidence of co-morbidities, including kidney disease (KD), has been observed <sup>1 2</sup>. Several studies have shown that acute renal failure (ARF) was three to four times more frequent in PLHIV than in the general population <sup>3</sup> <sup>4</sup> and that its incidence did not decrease as HAART became more common <sup>5</sup>. ARF, in the general population and PLHIV, has also been associated with longer hospital stays and higher costs, and with a risk of progression to chronic KD (CKD) <sup>6-8</sup>.

The incidence of CKD is reportedly higher in PLHIV than in people not infected with HIV <sup>9</sup>. Its prevalence has been estimated at between 1% in the D.A.D study <sup>10</sup> and 4.9% in a French cohort of 2,588 patients <sup>11</sup>. The proportion of HIV-associated nephropathy (HIVAN) has significantly fallen <sup>12</sup>, while that of other KDs, such as classical focal segmental glomerulosclerosis (FSGS) or HIV-associated immune complex KD (HIVICK), has increased <sup>13</sup>. The increase in the incidence of CKD could also be related to the nephrotoxicity of some antiretroviral drugs or to the increased frequency of co-morbidities, such as diabetes, hypertension, cardiovascular disease, or hepatitis C or B coinfection <sup>6 10 14</sup>.

However, to our knowledge, no studies have dealt with the epidemiology of KD leading to hospitalisation in PLHIV in the recent HAART era. We thus conducted a national observational study to describe hospital admissions for KD in PLHIV in France and to identify factors associated with such admissions.

## Patients and Methods

This study was an observational retrospective multicentre study based on nationwide PMSI (Programme de Médicalisation des Systèmes d'Information) data from 2008 to 2013. The French PMSI database is similar to the Medicare database and includes all admissions in all hospitals from 1997 onwards. Since 2007, it has been possible to link all discharge abstracts for a single patient. Diagnoses identified during hospital stays are coded according to the tenth edition of the International Classification of Diseases (ICD-10). This database



1  
2  
3 provides a vast amount of epidemiological information regarding hospitalised patients in  
4 France<sup>15-18</sup>, is truly representative, and can be used to detect rare events.  
5  
6

7  
8 In the first part of the study, all patients older than 18 years hospitalised with a  
9 main or associated diagnosis of HIV infection (ICD-10 code B20-24, Z21) were eligible. All  
10 patients with at least one hospitalisation lasting more than 24 hours were included. Those  
11 hospitalised for less than 24 hours were excluded since repeated short hospitalisations were  
12 most often regular follow-up consultations or ambulatory care. Age, sex, comorbidities and  
13 patient outcomes in the year following hospitalisation were collected. Each patient was  
14 classified as having past or present AIDS-defining illness (Centers for Disease Control (CDC)  
15 Stage C, codes B20-22, B241) or being HIV infected without progression to AIDS (CDC stages  
16 A and B, codes B23, B240, B249, and Z21). Hospital admissions with a main diagnosis code  
17 corresponding to KD (ICD-10 codes N00 to N39) in the year following the first hospitalisation  
18 with a diagnosis of HIV infection were collected. The KDs were defined and classified as  
19 follows: acute renal failure (codes N17 and 19), chronic KD either at first diagnosis or with  
20 associated complications, acute renal failure (code N18), nephrolithiasis (codes N13, 20, 21,  
21 22 and 23), pyelonephritis (codes N10, 11, 12 and 15), renal parenchymal diseases (including  
22 glomerular and tubular diseases) (codes N01-06, N08, N14, N16 and N25), and other KD  
23 (codes N26, 27, 28, 29 and N39). For glomerular diseases, both the syndrome (e.g. nephrotic  
24 syndrome) and the related disease (e.g. membranous nephropathy) were available. The  
25 identified syndromes were haematuria, proteinuria, nephrotic syndrome, and acute or  
26 chronic nephritic syndrome. Comorbidities were also collected: hypertension (codes I10-I15),  
27 diabetes mellitus (codes E10-E14), dyslipidaemia (code E78), heart failure (code I50),  
28 coinfection with hepatitis B and / or hepatitis C (codes B18.0 and B18.2), obesity (code E66),  
29 and cardiovascular diseases including coronary artery disease (codes I20-I25), peripheral  
30 artery disease (code I702) and stroke (codes I63, I64). The annual prevalence of  
31 hospitalisation due to KD among PLHIV and the annual distribution of the various KD were  
32 then assessed. The changes in annual prevalence were determined for the study period  
33 (2008-2013).  
34  
35  
36  
37  
38  
39  
40  
41  
42  
43  
44  
45  
46  
47  
48  
49  
50  
51  
52  
53  
54

55  
56 In the second part of the study which aimed to assess the incidence of hospital  
57 admission due to KD in PLHIV, only PLHIV newly followed in 2009 were taken into account,  
58 whatever the duration of their first hospitalisation. Newly followed PLHIV were defined as  
59  
60

1  
2  
3 patients hospitalised with a diagnosis of HIV infection in 2009 but with no hospitalisation for  
4 HIV infection in the previous two years. We considered these patients as “newly followed  
5 PLHIV” because very few HIV patients in France had medical follow up outside the hospital  
6 setting during the study period. The newly followed PLHIV were monitored for five years,  
7 and all hospitalisations for KD were analysed along with any associated co-morbidities.  
8  
9  
10  
11  
12

13 For all analyses, patients who were hospitalised several times for KD were only  
14 considered once. Changes over time in the proportion of PLHIV with KD were assessed using  
15 the Cochran Armitage Test, and changes in the number of patients in the HIV and KD cohorts  
16 were analysed with a Poisson model. We compared patient age in the AIDS defining-illness,  
17 non-AIDS HIV and the whole HIV cohorts with the t test, Mann Whitney test or Kruskal  
18 Wallis test. The characteristics of patients with and without AIDS were compared using  
19 Fisher’s exact test and the chi-square test. A Cox model was used to determine factors  
20 associated with a hospitalisation for incident KD, with a follow-up of 5 years. Individuals  
21 were censored at death, at the end of the follow-up or the latest all-cause hospitalisation for  
22 people without KD. In multivariate analyses, we introduced all the variables considered  
23 significant in the univariate analyses ( $p < 0.20$ ) and according to their clinical relevance. We  
24 have therefore included: age, gender, having past or present AIDS-defining illness, obesity,  
25 co-infection, dyslipidaemia, HTA, diabetes and cardiovascular diseases in the multivariate  
26 analyses. The proportional hazards assumption was assessed for each variable and  
27 interaction tested. To limit sparse-data bias<sup>19</sup>, we performed two penalisation estimations:  
28 the first one using the Firth bias adjustment<sup>20</sup> and the second one using data augmentation  
29<sup>21</sup>. SAS statistical software (version 9.3) was used for all analyses.  
30  
31  
32  
33  
34  
35  
36  
37  
38  
39  
40  
41  
42  
43  
44  
45  
46  
47  
48  
49  
50  
51  
52  
53  
54  
55  
56  
57  
58  
59  
60

## Results

### Patient characteristics

From 2008 to 2013, more than 5 million people were hospitalised each year in France. Their main characteristics over the study period are shown in **Table 1**. The proportion of patients hospitalized for KD rose progressively from 1.9% in 2008 to 2.4% in 2013 ( $p < 0.0001$ ).

During the same period, an average of 10,862 PLHIV were hospitalised per year (**Table 2**). There was a significant decrease in the number of PLHIV admissions from 2010 to 2013 ( $p < 0.0001$ ). There was also a significant increase in the mean age of these patients, from 45 years in 2008 to 48 years in 2013.

Since the mean proportion of patients hospitalized for KD was globally 2.2% in the general population (**Table 1**) and 3.5% in PLHIV (**Table 2**), the prevalence of admission for KD in PLHIV was 1.5 higher than in the general population.

The comorbidities known to be associated with an increased risk of KD in 2009 are presented in **Table 3**. Hepatic comorbidities were more frequently observed in hospitalised PLHIV (12.2% vs 0.3%), whereas all other comorbidities were more frequent in the general hospitalised population.

### The distribution of hospitalisations for KD in PLHIV

Of the HIV infected patients admitted to hospital, 2,254 (3.5%) were hospitalised for at least 24 hours for KD during the 5-year study period (**Table 2**). A significant increase was observed over time, from 3.0% in 2008 to 3.7% in 2013 ( $p = 0.0019$ ). The HIV patients hospitalised for KD were significantly older than the overall HIV cohort (50 +/- 13 years vs 46 +/- 12 years,  $p < 0.01$ ).

The most common KDs upon admission were ARF (25.4%, [23.0-30.1%]), nephrolithiasis (22.1%, [20.2-24.0%]) and pyelonephritis (22.1%, [15.9-26.8%]). The yearly proportion of patients hospitalised for ARF varied from 0.7% ( $n = 77$ ) to 1.0% ( $n = 101$ ) (0.9% on average, **Table 2**). Among hospitalisations for KD, the proportion of those linked to ARF remained stable over the study period (25.4% [23.0-30.1%]). The mean age of patients

1  
2  
3 hospitalised with ARF was higher than the mean age of the whole cohort (51 +/- 13 years vs  
4 46 +/- 12 years). Hospitalisation for ARF was more often observed in AIDS patients than in  
5 PLHIV without AIDS (30.1% vs 21.2%), the latter being older than the former (55 +/- 12 years  
6 vs 49 +/- 12). Hospitalisation for pyelonephritis was more common in AIDS patients, while the  
7 opposite was observed for nephrolithiasis  
8  
9  
10  
11

12 Other causes of hospitalisation for KD were renal parenchymal diseases (8.6%, [5.9-  
13 11.4%]), out of these glomerular diseases (6.4% of the hospitalisations for KD), with a  
14 roughly stable proportion throughout the study period. Of these glomerular diseases, 27%  
15 (n=48) were defined only by their glomerular syndrome, 25.2% (n=45) were defined via their  
16 association with another disease (such as infectious diseases, systemic disease and diabetes  
17 mellitus), and only 47.8% (n=85) were histologically assessed. The proportion of renal  
18 biopsies in AIDS PLHIV was similar to that in non-AIDS PLHIV (45.5% vs 37.6%). Of the  
19 histologically assessed glomerular diseases, FSGS was diagnosed in 37.6% of cases. While  
20 there was a non-significant upwards trend in the use of renal biopsy over the study period,  
21 the proportion of FSGS declined from 63.6% in 2008 to 27.3% in 2013. Other glomerular  
22 diseases were membranous nephropathy (14.1%, n=12), crescentic glomerulonephritis  
23 (12.9%, n=11), undetermined glomerulonephritis (10.6%, n=9), minimal change disease  
24 (9.4%, n=8) and membranoproliferative glomerulonephritis (7.1%, n=6). Mesangial  
25 proliferative glomerulonephritis and post-infectious glomerulonephritis were found in less  
26 than 5%. Tubulointerstitial disorders were infrequent (2.2%, n=49), decreasing from 3.3% in  
27 2008 to 1% in 2013 (P=0.18). Drug-related tubulointerstitial or tubular injuries were the main  
28 cause of these hospitalisations (53.1%, n= 26).  
29  
30  
31  
32  
33  
34  
35  
36  
37  
38  
39  
40  
41  
42  
43

#### 44 **Hospitalisations for KD in PLHIV newly followed in 2009**

45  
46  
47 Comorbidities in all newly followed PLHIV and in those hospitalised for KD are  
48 summarised in **Table 4**.  
49

50  
51 In 2009, 1113 PLHIV were newly followed, 66 of which were hospitalised for KD  
52 during the entire follow-up, which reveals a 5-year cumulative incidence of 5.9% (**Figure 1**).  
53 Twenty-two (33.0%) of these patients were coded for KD at the initial hospitalisation or  
54 within one year.  
55  
56  
57  
58  
59  
60

1  
2  
3 The median of follow-up time was 843 days with an interquartile range of 1,459 days.  
4  
5 As there was an interaction between having past or present AIDS-defining illness, or not, and  
6  
7 gender, Kaplan-Meier curves and the associated log-rank tests for each gender are  
8  
9 presented in **Figures 2A and 2B**. For women, the risk of KD was higher for those having past  
10  
11 or present AIDS-defining illness than those who did not ( $p=0.0127$ ). In multivariate survival  
12  
13 analysis (**Table 5**), cardiovascular disease was significantly associated with the risk of KD  
14  
15 (HR=3.39 [1.22-9.42]). When focusing on female gender, having past or present AIDS-  
16  
17 defining illness remained associated with this risk of KD (HR = 3.67 [1.26-10.70]). As our  
18  
19 confidence intervals were wide with huge upper 95% limits (greater about 10), we  
20  
21 performed two penalization estimations: the first one using the Firth bias adjustment and  
22  
23 the second one using data augmentation. With the Firth bias adjustment, we observed a  
24  
25 slight decrease of the upper 95% limits, while with the penalisation by data augmentation,  
26  
27 these limits were widely reduced with a HR=3.30 [1.46-7.49] for cardiovascular disease and a  
28  
29 HR=2.45 [1.07-5.58] for female gender having past or present AIDS-defining illness (**Table 5**).

30  
31 Among the causes of incident KD requiring hospital admission, ARF was involved in 25  
32  
33 cases, and 66.7% of these occurred in the first two years of follow-up (50.0% in the first year  
34  
35 and 16.7% in the second year). The 5-year cumulative incidence of ARF was 1.6%. No risk  
36  
37 factor was significantly associated with the development of incident ARF requiring  
38  
39 hospitalisation.  
40  
41  
42  
43  
44  
45  
46  
47  
48  
49  
50  
51  
52  
53  
54  
55  
56  
57  
58  
59  
60

## Discussion

1  
2  
3  
4  
5  
6 Firstly, this study found that patients hospitalised for KD are 1.5 more frequent in  
7 PLHIV than in the general population. The rate of patients hospitalised increased steadily  
8 over time despite the fact that risk factors for KD are less frequent in PLHIV than in the  
9 general hospitalised population, except for hepatitis coinfections. These rates have  
10 increased significantly in recent years (from 3.0% in 2008 to 3.7% in 2013), albeit similar to  
11 the rates observed in the general population (5-year difference 0.7% vs 0.5%). ARF,  
12 nephrolithiasis and pyelonephritis accounted for more than three-quarters of hospital  
13 admissions for KD in our study. Glomerular or tubular diseases were rather infrequent but  
14 stable causes of hospitalisation. The most frequent glomerular disease was FSGS with 37.6%  
15 of histological codes, albeit with a downward trend since the beginning of the HAART era.

16  
17  
18  
19  
20  
21  
22  
23  
24  
25 Another point is that ARF often occurs within 2 years following the diagnosis of HIV  
26 for the two-thirds of the newly diagnosed and followed PLHIV who subsequently presented  
27 ARF.  
28  
29

30  
31  
32  
33  
34  
35  
36  
37  
38  
39  
40  
41  
42  
43  
44  
45  
46  
47  
48  
49  
50  
51  
52  
53  
54  
55  
56  
57  
58  
59  
60  
The last key finding is that nearly 6% of PLHIV were hospitalised for KD during the 5  
years following the diagnosis of HIV infection, and that the risk was strongly associated with  
the presence of cardiovascular disease.

To our knowledge, this study is the first to focus on hospital admissions for KD in a  
large population of PLHIV. In our study, more than 10,850 PLHIV were hospitalised each  
year, i.e. about 10% of the estimated cohort of 110,900 PLHIV medically followed-up in 2010  
in France. The exhaustive nature of our data ensures that the results are representative of all  
hospitalisations for KD in France, which is particularly important for both HIV and kidney  
disease which can be influenced by the ethnic origins of the population

This study is the first to show such a trend in a nationwide setting, and is consistent  
with other studies that have reported hospitalisations rates for KD ranging from 2.6% to  
3.3%<sup>22</sup>.

The proportion of FSGS at the beginning of our study (63.6% in 2008) is similar to  
that reported in other studies<sup>13 23 24</sup>, and the trend towards a decrease in the percentage we  
observed (27.3% in 2013) was also reported in another recent study (28%)<sup>25</sup>.

1  
2  
3 ARF was responsible for approximately 1% of in hospitalised PLHIV, a rate which is  
4 lower than that observed in the few previous studies focusing on PLHIV (2.8 to 5.9 per 100  
5 patient years<sup>3 4 26</sup>. The most likely explanation is that we only considered ARF cases leading  
6 to hospitalisation, and not all ARF, including those occurring in inpatients hospitalised for  
7 other reasons (e.g. sepsis or volume depletion). For example, 31% (34/111) of patients in the  
8 study by Franceschini *et al.* developed ARF during a hospital stay, and 38% had community-  
9 acquired ARF not requiring hospitalisation<sup>27</sup>. Furthermore, we also did not consider ARF in  
10 PLHIV hospitalised for CKD. This also probably explains why many studies reported ARF  
11 hospitalisation rates that were 3 or 4 times higher in PLHIV than in the general population,  
12 whereas we observed an ARF hospitalisation rate in PLHIV close to that observed in the  
13 general population (0.6 to 1%)<sup>28 29</sup>. Nonetheless, ARF remains a concern in PLHIV as the  
14 average age at the time of hospitalisation is lower than that in the general population.  
15

16  
17 Our study has several limitations, the main one being the use of administrative codes.  
18 However, these codes are based on the clinical judgment of physicians and laboratory  
19 values. The use of this type of database has been validated for KD<sup>30 31</sup> and particularly for  
20 ARF<sup>30 31</sup>. In addition, the infrequent use of renal biopsies precluded an extended analysis of  
21 parenchymal KD leading to hospitalisation, and we do not distinguish HIVAN from HIVICK.  
22 Finally, it was not possible to provide accurate characteristics of the HIV infection in the  
23 absence of data on HIV viral load or CD4 cell count, and/or on the antiretroviral drugs used.  
24 Nonetheless, the aim of our study was to provide an overview of kidney disease in PLHIV.  
25 Moreover, our high hazard ratios and wide confidence intervals could be a sign of sparse-  
26 data bias, which may be due to our small number of events. However, after performing  
27 penalised estimation such as Firth bias adjustment or penalisation by data augmentation, we  
28 were able to reduce our upper 95% limits while maintaining the significance of our different  
29 factors.  
30  
31

32  
33 Other studies are necessary to extend the available data about each kidney condition  
34 in PLHIV.  
35

36  
37 FSGS, which is probably represented by HIVAN, is still the most frequent nephropathy  
38 in PLHIV though it has decreased relative to other glomerulopathies following the expansion  
39 of HAART (13,15). Nevertheless, nearly 60% of our PLHIV cohort hospitalised for glomerular  
40  
41  
42  
43  
44  
45  
46  
47  
48  
49  
50  
51  
52  
53  
54  
55  
56  
57  
58  
59  
60

1  
2  
3 disease were not biopsied. Almost 50% of these patients had proteinuria or nephrotic  
4 syndrome (3.4% and 44.4%, respectively). These figures reveal a gap between the proportion  
5 of glomerular diseases and the number of renal biopsies performed. Several studies have  
6 confirmed the importance of performing kidney biopsies in PLHIV <sup>25 32</sup>. Radiological  
7 examinations, urinary findings, renal function biological and proteinuria evaluations do not  
8 provide sufficiently specific information to diagnose HIV-related nephropathy <sup>32 33</sup>. Much like  
9 U.S. guidelines from 2014 <sup>4</sup>, the French guidelines <sup>34</sup> recommend referring patients to a  
10 nephrologist if the eGFR falls to less than 60 ml/min and/or as soon as proteinuria appears.  
11 The U.S. recommendations also suggest that biopsies should be done in HIV-infected  
12 patients in whom a definitive diagnosis may affect management or inform the prognosis <sup>4</sup>.  
13  
14  
15  
16  
17  
18  
19  
20  
21

22 ARF often occurs early during follow-up <sup>35 36</sup> with a 10-fold higher rate of ARF in the  
23 first 3 months after the introduction of HAART <sup>35</sup>, probably reflecting the disease burden in  
24 PLHIV with more advanced HIV disease and concurrent infections at the time of admission <sup>35</sup>  
25 <sup>36</sup>. Indeed, opportunistic infections may play an important role in the development of early  
26 onset ARF.  
27  
28  
29  
30  
31

32 By contrast, associated comorbidities and HAART toxicity are important factors  
33 leading to "late-onset ARF" <sup>35</sup>, as suggested by the older age of non-AIDS PLHIV experiencing  
34 ARF. This can probably be explained by the pathophysiological link between some  
35 comorbidities such as cardiovascular diseases and KD, that has also been reported in PLHIV <sup>37-</sup>  
36 <sup>39</sup>. Since cardiovascular comorbidity is particularly frequent in PLHIV <sup>40</sup>, it should be closely  
37 monitored and managed to prevent serious KD.  
38  
39  
40  
41  
42  
43

44 In conclusion, the proportion of PLHIV hospitalised for ARF and other types of KD  
45 remains significant and has not decreased despite the increasing use of HAART. PLHIV must  
46 be considered a high-risk population for KD, particularly for those with simultaneous  
47 cardiovascular disease. ARF remains the leading cause of hospitalisation for renal disorders,  
48 which essentially occur early during the follow-up, suggesting the need for regular and  
49 specific follow-up, at least during the first year. Glomerular and tubular diseases, which were  
50 also stable over time, should be documented more often by biopsies, whose results can  
51 inform the clinicians who treat these diseases, and improve prognostic outcomes. All of  
52  
53  
54  
55  
56  
57  
58  
59  
60



1  
2  
3 these data reflect changes in the impact of HIV infection, comorbidities and treatments, and  
4 underline the need to regularly address this issue in the future.  
5  
6  
7  
8  
9  
10  
11  
12  
13  
14  
15  
16  
17  
18  
19  
20  
21  
22  
23  
24  
25  
26  
27  
28  
29  
30  
31  
32  
33  
34  
35  
36  
37  
38  
39  
40  
41  
42  
43  
44  
45  
46  
47  
48  
49  
50  
51  
52  
53  
54  
55  
56  
57  
58  
59  
60

For peer review only

## References

1. Selik RM, Byers RH, Jr., Dworkin MS. Trends in diseases reported on U.S. death certificates that mentioned HIV infection, 1987-1999. *J Acquir Immune Defic Syndr* 2002;29(4):378-87.
2. Adih WK, Selik RM, Hu X. Trends in Diseases Reported on US Death Certificates That Mentioned HIV Infection, 1996-2006. *J Int Assoc Physicians AIDS Care (Chic)* 2011;10(1):5-11. doi: 10.1177/1545109710384505
3. Wyatt CM, Arons RR, Klotman PE, et al. Acute renal failure in hospitalized patients with HIV: risk factors and impact on in-hospital mortality. *AIDS* 2006;20(4):561-5. doi: 10.1097/01.aids.0000210610.52836.07
4. Lucas GM, Ross MJ, Stock PG, et al. Clinical practice guideline for the management of chronic kidney disease in patients infected with HIV: 2014 update by the HIV Medicine Association of the Infectious Diseases Society of America. *Clin Infect Dis* 2014;59(9):e96-138. doi: 10.1093/cid/ciu617
5. Li Y, Shlipak MG, Grunfeld C, et al. Incidence and risk factors for acute kidney injury in HIV Infection. *Am J Nephrol* 2012;35(4):327-34. doi: 10.1159/000337151
6. Choi AI, Li Y, Parikh C, et al. Long-term clinical consequences of acute kidney injury in the HIV-infected. *Kidney Int* 2010;78(5):478-85. doi: 10.1038/ki.2010.171
7. Hsu CY, Chertow GM, McCulloch CE, et al. Nonrecovery of kidney function and death after acute on chronic renal failure. *Clin J Am Soc Nephrol* 2009;4(5):891-8. doi: 10.2215/CJN.05571008
8. Lattanzio MR, Kopyt NP. Acute kidney injury: new concepts in definition, diagnosis, pathophysiology, and treatment. *J Am Osteopath Assoc* 2009;109(1):13-9.
9. Lucas GM, Mehta SH, Atta MG, et al. End-stage renal disease and chronic kidney disease in a cohort of African-American HIV-infected and at-risk HIV-seronegative participants followed between 1988 and 2004. *AIDS* 2007;21(18):2435-43. doi: 10.1097/QAD.0b013e32827038ad
10. Mocroft A, Lundgren JD, Ross M, et al. Cumulative and current exposure to potentially nephrotoxic antiretrovirals and development of chronic kidney disease in HIV-positive individuals with a normal baseline estimated glomerular filtration rate: a prospective international cohort study. *Lancet HIV* 2016;3(1):e23-32. doi: 10.1016/S2352-3018(15)00211-8
11. Deti EK, Thiebaut R, Bonnet F, et al. Prevalence and factors associated with renal impairment in HIV-infected patients, ANRS C03 Aquitaine Cohort, France. *HIV Med* 2010;11(5):308-17. doi: 10.1111/j.1468-1293.2009.00780.x
12. Wali RK, Drachenberg CI, Papadimitriou JC, et al. HIV-1-associated nephropathy and response to highly-active antiretroviral therapy. *Lancet* 1998;352(9130):783-4. doi: 10.1016/S0140-6736(98)24037-2
13. Lescure FX, Flateau C, Pacanowski J, et al. HIV-associated kidney glomerular diseases: changes with time and HAART. *Nephrol Dial Transplant* 2012;27(6):2349-55. doi: 10.1093/ndt/gfr676
14. Flandre P, Pugliese P, Cuzin L, et al. Risk factors of chronic kidney disease in HIV-infected patients. *Clin J Am Soc Nephrol* 2011;6(7):1700-7. doi: 10.2215/CJN.09191010
15. Pages PB, Cottenet J, Mariet AS, et al. In-hospital mortality following lung cancer resection: nationwide administrative database. *Eur Respir J* 2016;47(6):1809-17. doi: 10.1183/13993003.00052-2016
16. Creuzot-Garcher C, Benzenine E, Mariet AS, et al. Incidence of Acute Postoperative Endophthalmitis after Cataract Surgery: A Nationwide Study in France from 2005 to 2014. *Ophthalmology* 2016;123(7):1414-20. doi: 10.1016/j.ophtha.2016.02.019
17. Abdulmalak C, Cottenet J, Beltramo G, et al. Haemoptysis in adults: a 5-year study using the French nationwide hospital administrative database. *Eur Respir J* 2015;46(2):503-11. doi: 10.1183/09031936.00218214
18. Quantin C, Benzenine E, Velten M, et al. Self-controlled case series and misclassification bias induced by case selection from administrative hospital databases: application to febrile convulsions in pediatric vaccine pharmacoepidemiology. *Am J Epidemiol* 2013;178(12):1731-9. doi: 10.1093/aje/kwt207

19. Greenland S, Mansournia M, Altman D. Sparse data bias: a problem hiding in plain sight. *BMJ* 2016;352:i1981.
20. Firth D. Bias reduction of maximum likelihood estimates *Biometrika* 2013;80:27-38.
21. Sullivan S, Greenland S. Bayesian regression in SAS software. *Int J Epidemiol* 2013;42:308-17.
22. Crum-Cianflone NF, Grandits G, Echols S, et al. Trends and causes of hospitalizations among HIV-infected persons during the late HAART era: what is the impact of CD4 counts and HAART use? *J Acquir Immune Defic Syndr* 2010;54(3):248-57.
23. Berliner AR, Fine DM, Lucas GM, et al. Observations on a cohort of HIV-infected patients undergoing native renal biopsy. *Am J Nephrol* 2008;28(3):478-86. doi: 10.1159/000112851
24. Bohmart A, Burns G. Renal disease in an urban HIV population in the era prior and following the introduction of highly active antiretroviral therapy. *J Natl Med Assoc* 2011;103(6):513-7.
25. da Silva DR, Gluz IC, Kurz J, et al. Multiple facets of HIV-associated renal disease. *Braz J Med Biol Res* 2016;49(4):e5176. doi: 10.1590/1414-431X20165176
26. Ibrahim F, Naftalin C, Cheserem E, et al. Immunodeficiency and renal impairment are risk factors for HIV-associated acute renal failure. *AIDS* 2010;24(14):2239-44. doi: 10.1097/QAD.0b013e32833c85d6
27. Franceschini N, Napravnik S, Eron JJ, Jr., et al. Incidence and etiology of acute renal failure among ambulatory HIV-infected patients. *Kidney Int* 2005;67(4):1526-31. doi: 10.1111/j.1523-1755.2005.00232.x
28. Schissler MM, Zaidi S, Kumar H, et al. Characteristics and outcomes in community-acquired versus hospital-acquired acute kidney injury. *Nephrology (Carlton)* 2013;18(3):183-7. doi: 10.1111/nep.12036
29. Mesropian PD, Othersen J, Mason D, et al. Community-acquired acute kidney injury: A challenge and opportunity for primary care in kidney health. *Nephrology (Carlton)* 2016;21(9):729-35. doi: 10.1111/nep.12751
30. Vlasschaert ME, Bejaimal SA, Hackam DG, et al. Validity of administrative database coding for kidney disease: a systematic review. *Am J Kidney Dis* 2011;57(1):29-43. doi: 10.1053/j.ajkd.2010.08.031
31. Waikar SS, Wald R, Chertow GM, et al. Validity of International Classification of Diseases, Ninth Revision, Clinical Modification Codes for Acute Renal Failure. *J Am Soc Nephrol* 2006;17(6):1688-94. doi: 10.1681/ASN.2006010073
32. Cohen SD, Kimmel PL. Renal biopsy is necessary for the diagnosis of HIV-associated renal diseases. *Nat Clin Pract Nephrol* 2009;5(1):22-3. doi: 10.1038/ncpneph0990
33. Fine DM, Perazella MA, Lucas GM, et al. Kidney biopsy in HIV: beyond HIV-associated nephropathy. *Am J Kidney Dis* 2008;51(3):504-14. doi: 10.1053/j.ajkd.2007.12.005
34. Morlat P. Prise en charge médicale des personnes vivant avec le VIH : recommandations du groupe d'experts : rapport 2013. Paris: Direction de l'information légale et administrative 2013.
35. Roe J, Campbell LJ, Ibrahim F, et al. HIV care and the incidence of acute renal failure. *Clin Infect Dis* 2008;47(2):242-9. doi: 10.1086/589296
36. Naicker S, Aboud O, Gharbi MB. Epidemiology of acute kidney injury in Africa. *Semin Nephrol* 2008;28(4):348-53. doi: 10.1016/j.semnephrol.2008.04.003
37. Roy SK, Estrella MM, Darilay AT, et al. Glomerular filtration rate and proteinuria associations with coronary artery calcium among HIV-infected and HIV-uninfected men in the Multicenter AIDS Cohort Study. *Coron Artery Dis* 2017;28(1):17-22. doi: 10.1097/MCA.0000000000000428
38. Ryom L, Mocroft A, Kirk O, et al. Predictors of advanced chronic kidney disease and end-stage renal disease in HIV-positive persons. *AIDS* 2014;28(2):187-99. doi: 10.1097/QAD.0000000000000042
39. Ryom L, Lundgren JD, Ross M, et al. Renal Impairment and Cardiovascular Disease in HIV-Positive Individuals: The D:A:D Study. *J Infect Dis* 2016;214(8):1212-20. doi: 10.1093/infdis/jiw342
40. Hanna DB, Ramaswamy C, Kaplan RC, et al. Trends in Cardiovascular Disease Mortality Among Persons With HIV in New York City, 2001-2012. *Clin Infect Dis* 2016;63(8):1122-9. doi: 10.1093/cid/ciw470

**Table 1:** General patient population characteristics and distribution of KD and ARF hospital admissions, per year

| General population                                                                                          | 2008          | 2009          | 2010          | 2011          | 2012          | 2013          | Mean          |
|-------------------------------------------------------------------------------------------------------------|---------------|---------------|---------------|---------------|---------------|---------------|---------------|
| <b>Number of patients hospitalised (n, all causes)</b>                                                      | 5287364       | 5232412       | 5170695       | 5193430       | 5217264       | 5163969       | 5210856       |
| <b>Sex ratio (M/F)</b>                                                                                      | 47.3% / 52.7% | 48.1% / 51.9% | 48.0% / 52.0% | 47.9% / 52.1% | 47.7% / 52.3% | 47.8% / 52.2% | 47.8% / 52.2% |
| <b>Age (mean, years)</b>                                                                                    | 59 +/- 20     | 59 +/- 20     | 60 +/- 20     | 60 +/- 20     | 60 +/- 20     | 61 +/- 20     | 60+/-20       |
| <b>Number of patients hospitalised (for more than 24 hours for kidney disease, n ,% general population)</b> | 102420 (1.9%) | 106853 (2.0%) | 109931 (2.1%) | 113492 (2.2%) | 118000 (2.3%) | 122515 (2.4%) | 112202 (2.2%) |
| <b>Sex ratio (M/F)</b>                                                                                      | 53.0% / 47.0% | 52.9% / 47.1% | 52.7% / 47.3% | 52.7% / 47.3% | 52.6% / 47.4% | 52.4% / 47.6% | 52.7%/47.3%   |
| <b>Age (mean, years)</b>                                                                                    | 64 +/- 18     | 64 +/- 18     | 65 +/- 18     | 65 +/- 18     | 65 +/- 18     | 66 +/- 18     | 65+/-18       |
| <b>Number of patients hospitalised (for more than 24 hours for ARF , n, % of general population)</b>        | 15993 (0.3%)  | 17473 (0.3%)  | 16567 (0.3%)  | 16491 (0.3%)  | 17082 (0.3%)  | 17478 (0.3%)  | 16847 (0.3%)  |
| <b>Sex ratio (M/F)</b>                                                                                      | 59.2% / 40.8% | 58.5% / 41.5% | 59.6% / 40.4% | 59.2% / 40.8% | 59.4% / 40.6% | 59.6% / 40.4% | 59.3%/40.7%   |
| <b>Age (mean, years)</b>                                                                                    | 71 +/- 15     | 71 +/- 15     | 71 +/-15      | 71 +/- 15     | 71 +/- 14     | 71+/- 15      | 71+/- 15      |

The proportion of patients hospitalised for KD rose progressively from 1.9% in 2008 to 2.4% in 2013: Cochran-Armitage test, p<0.0001

**Table 2: General characteristics of PLHIV and distribution of KD and ARF hospitalisations, per year**

| People living with HIV                                                                                            | 2008          | 2009          | 2010          | 2011          | 2012          | 2013          | Mean                 |
|-------------------------------------------------------------------------------------------------------------------|---------------|---------------|---------------|---------------|---------------|---------------|----------------------|
| <b>Number of patients hospitalised (n, all causes)</b>                                                            | 10 878        | 11 418        | 11226         | 10 638        | 10 568        | 10 445        | <b>10 862 *</b>      |
| <b>Sex ratio (M/F)</b>                                                                                            | 61.3% / 38.7% | 61.1% / 38.9% | 60.9% / 39.1% | 62.0% / 38.0% | 61.7% / 38.3% | 62.5% / 36.5% | <b>61.6% / 38.4%</b> |
| <b>Age (mean, years)</b>                                                                                          | 45 +/- 12     | 45 +/- 12     | 46 +/- 12     | 47 +/- 12     | 47 +/- 12     | 48 +/- 13     | <b>46+/-12</b>       |
| <b>AIDS-defining illness stage (n, %)</b>                                                                         | 4204 (38.6%)  | 4302 (37.7%)  | 4403 (39.2%)  | 4005 (37.6%)  | 3865 (36.6%)  | 3692 (35.3%)  | <b>4124 (37.5%)</b>  |
| <b>Number of patients hospitalised (longer than 24 hours for KD, n, % of hospitalised HIV positive patients)</b>  | 330 (3.0%)    | 396 (3.5%)    | 365 (3.3%)    | 378 (3.6%)    | 396 (3.7%)    | 389 (3.7%)    | <b>376 (3.5%) **</b> |
| <b>Sex ratio (M/F)</b>                                                                                            | 60.6% / 39.4% | 61.4% / 38.6% | 65.2% / 34.8% | 62.2% / 37.8% | 58.6% / 41.4% | 60.7% / 39.3% | <b>61.4% / 38.6%</b> |
| <b>Age (mean, years)</b>                                                                                          | 48 +/- 12     | 50 +/- 13     | 51 +/- 13     | 49 +/- 13     | 52 +/- 13     | 52 +/- 13     | <b>50+/-13</b>       |
| <b>AIDS-defining illness stage (n, %)</b>                                                                         | 159 (48.2%)   | 178 (44.9%)   | 180 (49.3%)   | 184 (48.7%)   | 178 (44.9%)   | 180 (46.3%)   | <b>177 (47.0%)</b>   |
| <b>Number of patients hospitalised (longer than 24 hours for ARF, n, % of hospitalised HIV positive patients)</b> | 77 (0.7%)     | 105 (0.9%)    | 110 (1.0%)    | 87 (0.8%)     | 92 (0.9%)     | 101 (1.0%)    | <b>95 (0.9%)</b>     |
| <b>Sex ratio (M/F)</b>                                                                                            | 74.0% / 26.0% | 70.5% / 29.5% | 71.8% / 28.2% | 71.3% / 28.7% | 80.4% / 19.6% | 74.3% / 25.7% | <b>73.6%/26.4%</b>   |
| <b>Age (mean, years)</b>                                                                                          | 48 +/- 11     | 50 +/- 13     | 50 +/-12      | 50 +/- 12     | 55 +/- 12     | 55 +/- 13     | <b>51+/- 13</b>      |
| <b>AIDS-defining illness stage (n, %)</b>                                                                         | 41 (53.2%)    | 57 (54.3%)    | 64 (58.2%)    | 53 (60.9%)    | 46 (50.0%)    | 58 (57.4%)    | <b>53 (55.8%)</b>    |

\* There was a significant decrease in the number of PLHIV admissions from 2010 to 2013: Poisson model,  $p < 0.0001$

\*\* A significant increase of the proportion of patients hospitalized for KD was observed over time, from 3.0% in 2008 to 3.7% in 2013: Cochran-Armitage test,  $p = 0.0019$

**Table 3: Comorbidities in the hospitalised general population and hospitalised HIV population for the year 2009**

| Comorbidities                   | General population | HIV          | p-value** |
|---------------------------------|--------------------|--------------|-----------|
|                                 | n=5232412          | n=11418      |           |
| Hepatitis co-infections* , n, % | 16390 (0.3%)       | 1397 (12.2%) | <0.0001   |
| Hypertension, n, %              | 1136018 (21.7%)    | 927 (8.1%)   | <0.0001   |
| Diabetes mellitus, n, %         | 526511 ( 10.1%)    | 651 (5.7%)   | <0.0001   |
| Cardiovascular diseases‡, n, %  | 683316 (13.1%)     | 821 (7.2%)   | <0.0001   |
| Dyslipidaemia, n, %             | 375600 (7.2%)      | 425 (3.7%)   | <0.0001   |
| Obesity, n, %                   | 282517 (5.4%)      | 229 (2.0%)   | <0.0001   |
| Heart failure, n, %             | 218697 (4.2%)      | 151 (1.3%)   | <0.0001   |

\*Hepatitis co-infections included hepatitis C and/or hepatitis B

\*\* chi-square test

‡ Cardiovascular diseases included coronary artery diseases, peripheral artery disease and stroke.

**Table 4:** Comorbidities in all newly followed PLHIV and in those hospitalised for KD

| Comorbidities                  | Total newly followed PLHIV<br>n=1113 | Newly followed PLHIV with KD<br>n=66 | p-value** |
|--------------------------------|--------------------------------------|--------------------------------------|-----------|
| Hepatitis co-infections , n, % | 89 (8.0%)                            | 4 (6.1%)                             | 0.5708    |
| Hypertension, n, %             | 53 (4.8%)                            | 5 (7.6%)                             | 0.3701    |
| Mellitus diabetes, n, %        | 37 (3.3%)                            | 2 (3.0%)                             | 1.0000    |
| Cardiovascular diseases‡, n, % | 28 (2.5%)                            | 5 (7.6%)                             | 0.0330    |
| Dyslipidaemia, n, %            | 11 (1.0%)                            | 1 (1.5%)                             | 0.5007    |
| Obesity, n, %                  | 14 (1.3%)                            | 2 (3.0%)                             | 0.2243    |
| Heart failure, n, %            | 5 (0.4%)                             | 1 (1.5%)                             | 0.2928    |

\*Hepatitis co-infections including hepatitis C and/or hepatitis B

\*\* Fisher's exact test or chi-square test

‡ Cardiovascular diseases included coronary artery diseases, peripheral artery disease and stroke.

1  
2  
3  
4  
5  
6  
7  
8  
9  
10  
11  
12  
13  
14  
15  
16  
17  
18  
19  
20  
21  
22  
23  
24  
25  
26  
27  
28  
29  
30  
31  
32  
33  
34  
35  
36  
37  
38  
39  
40  
41  
42  
43  
44  
45  
46

**Table 5: Survival analyses**

|                        | Cox model         | Firth bias adjustment | Penalisation by data augmentation |
|------------------------|-------------------|-----------------------|-----------------------------------|
|                        | HR [95% CI]       | HR [95% CI]           | HR [95% CI]                       |
| Cardiovascular disease | 3.39 [1.22-9.42]  | 3.77 [1.23-8.91]      | 3.30 [1.46-7.49]                  |
| AIDS* in women         | 3.67 [1.26-10.70] | 3.34 [1.19-9.38]      | 2.45 [1.07-5.58]                  |
| AIDS* in men           | 0.72 [0.37-1.40]  | 0.71 [0.36-1.39]      | 0.93 [0.51-1.72]                  |

HR: Hazard ratio ; CI: Confidence interval  
 Adjusted on age, obesity, co-infection, dyslipidaemia, HTA and diabetes  
 \* AIDS = having past or present AIDS-defining illness



1  
2  
3  
4  
5  
6  
7 **Figure 1:** *Cumulative incidence of KD requiring hospitalisation for all newly followed PLHIV*  
8 *(grey curve), for those without past or present AIDS (light bars) and for those with past or*  
9 *present AIDS-defining illness (dark bars).*  
10  
11  
12  
13  
14

15 **Figure 2:** *Kaplan-Meier curve to estimate the risk of KD with time according to the AIDS*  
16 *status(having past or present AIDS-defining illness or not) A: for women, B: for men*  
17  
18  
19  
20  
21  
22  
23  
24  
25  
26  
27  
28  
29  
30  
31  
32  
33  
34  
35  
36  
37  
38  
39  
40  
41  
42  
43  
44  
45  
46  
47  
48  
49  
50  
51  
52  
53  
54  
55  
56  
57  
58  
59  
60

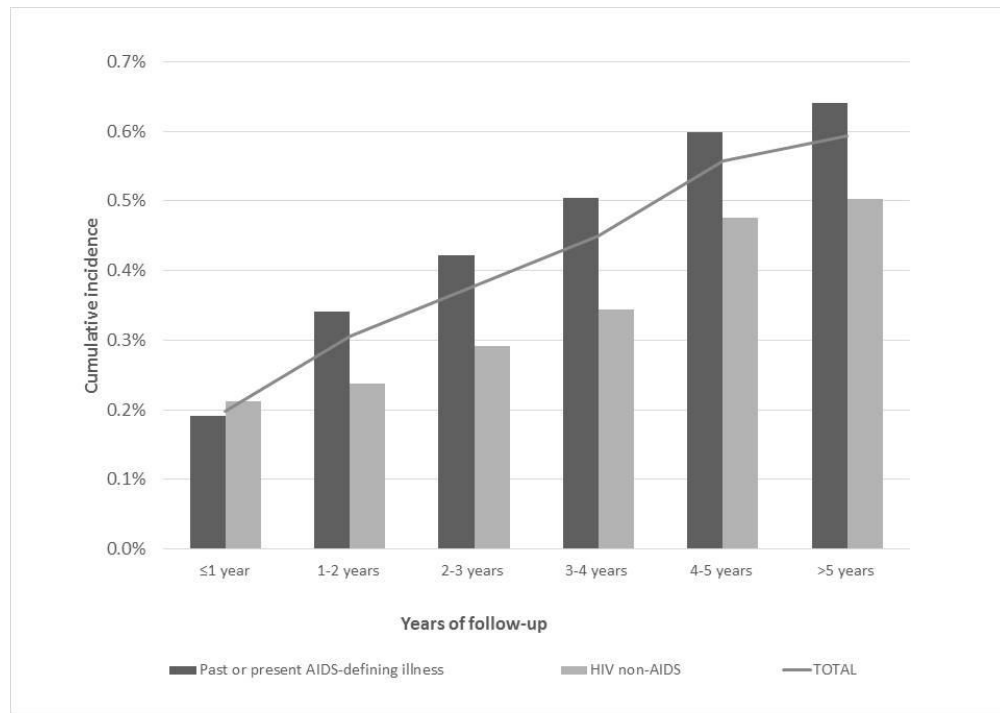

Figure 1: Cumulative incidence of KD requiring hospitalisation for all newly followed PLHIV (grey curve), for those without past or present AIDS (light bars) and for those with past or present AIDS-defining illness (dark bars).

81x60mm (300 x 300 DPI)

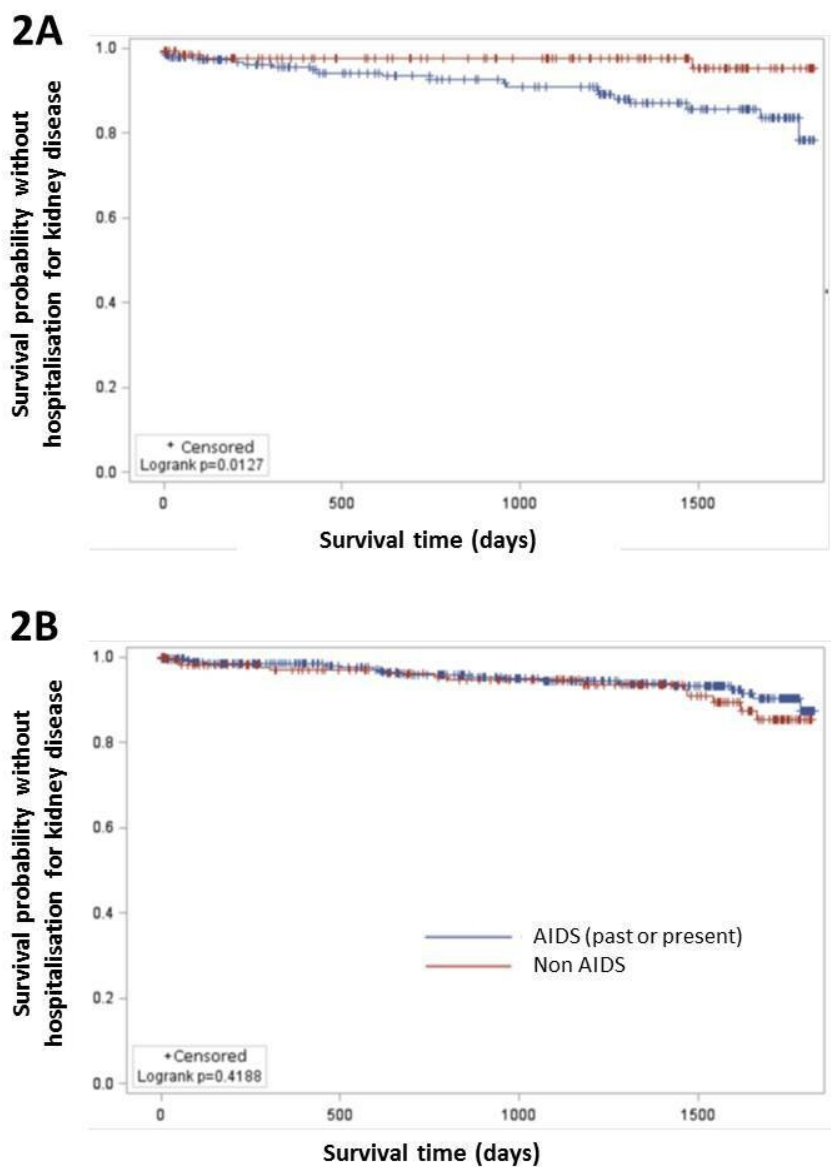

Figure 2: Kaplan-Meier curve to estimate the risk of KD with time according to the AIDS status(having past or present AIDS-defining illness or not) A: for women, B: for men

60x81mm (300 x 300 DPI)

1  
2  
3  
4  
5  
6  
7  
8  
9  
10  
11  
12  
13  
14  
15  
16  
17  
18  
19  
20  
21  
22  
23  
24  
25  
26  
27  
28  
29  
30  
31  
32  
33  
34  
35  
36  
37  
38  
39  
40  
41  
42  
43  
44  
45  
46  
47  
48  
49  
50  
51  
52  
53  
54  
55  
56  
57  
58  
59  
60

## STROBE Statement—checklist of items that should be included in reports of observational studies

|                              | Item No | Recommendation                                                                                                                                                                                                                                                                                                                                                                                                                                                         | Page No |
|------------------------------|---------|------------------------------------------------------------------------------------------------------------------------------------------------------------------------------------------------------------------------------------------------------------------------------------------------------------------------------------------------------------------------------------------------------------------------------------------------------------------------|---------|
| <b>Title and abstract</b>    | 1       | (a) Indicate the study's design with a commonly used term in the title or the abstract                                                                                                                                                                                                                                                                                                                                                                                 | 1       |
|                              |         | (b) Provide in the abstract an informative and balanced summary of what was done and what was found                                                                                                                                                                                                                                                                                                                                                                    | 3       |
| <b>Introduction</b>          |         |                                                                                                                                                                                                                                                                                                                                                                                                                                                                        |         |
| Background/rationale         | 2       | Explain the scientific background and rationale for the investigation being reported                                                                                                                                                                                                                                                                                                                                                                                   | 5       |
| Objectives                   | 3       | State specific objectives, including any prespecified hypotheses                                                                                                                                                                                                                                                                                                                                                                                                       | 5       |
| <b>Methods</b>               |         |                                                                                                                                                                                                                                                                                                                                                                                                                                                                        |         |
| Study design                 | 4       | Present key elements of study design early in the paper                                                                                                                                                                                                                                                                                                                                                                                                                | 5       |
| Setting                      | 5       | Describe the setting, locations, and relevant dates, including periods of recruitment, exposure, follow-up, and data collection                                                                                                                                                                                                                                                                                                                                        | 5       |
| Participants                 | 6       | (a) <i>Cohort study</i> —Give the eligibility criteria, and the sources and methods of selection of participants. Describe methods of follow-up<br><i>Case-control study</i> —Give the eligibility criteria, and the sources and methods of case ascertainment and control selection. Give the rationale for the choice of cases and controls<br><i>Cross-sectional study</i> —Give the eligibility criteria, and the sources and methods of selection of participants | 5-6     |
|                              |         | (b) <i>Cohort study</i> —For matched studies, give matching criteria and number of exposed and unexposed<br><i>Case-control study</i> —For matched studies, give matching criteria and the number of controls per case                                                                                                                                                                                                                                                 | NA      |
| Variables                    | 7       | Clearly define all outcomes, exposures, predictors, potential confounders, and effect modifiers. Give diagnostic criteria, if applicable                                                                                                                                                                                                                                                                                                                               | 6       |
| Data sources/<br>measurement | 8*      | For each variable of interest, give sources of data and details of methods of assessment (measurement). Describe comparability of assessment methods if there is more than one group                                                                                                                                                                                                                                                                                   | 6       |
| Bias                         | 9       | Describe any efforts to address potential sources of bias                                                                                                                                                                                                                                                                                                                                                                                                              | 6-7     |
| Study size                   | 10      | Explain how the study size was arrived at                                                                                                                                                                                                                                                                                                                                                                                                                              | 6       |
| Quantitative variables       | 11      | Explain how quantitative variables were handled in the analyses. If applicable, describe which groupings were chosen and why                                                                                                                                                                                                                                                                                                                                           | 7       |
| Statistical methods          | 12      | (a) Describe all statistical methods, including those used to control for confounding                                                                                                                                                                                                                                                                                                                                                                                  | 7       |
|                              |         | (b) Describe any methods used to examine subgroups and interactions                                                                                                                                                                                                                                                                                                                                                                                                    | 7       |
|                              |         | (c) Explain how missing data were addressed                                                                                                                                                                                                                                                                                                                                                                                                                            | NA      |
|                              |         | (d) <i>Cohort study</i> —If applicable, explain how loss to follow-up was addressed<br><i>Case-control study</i> —If applicable, explain how matching of cases and controls was addressed<br><i>Cross-sectional study</i> —If applicable, describe analytical methods taking account of sampling strategy                                                                                                                                                              | NA      |
|                              |         | (e) Describe any sensitivity analyses                                                                                                                                                                                                                                                                                                                                                                                                                                  | NA      |

Continued on next page

| <b>Results</b>           |     |                                                                                                                                                                                                              |                 |
|--------------------------|-----|--------------------------------------------------------------------------------------------------------------------------------------------------------------------------------------------------------------|-----------------|
| 7Participants            | 13* | (a) Report numbers of individuals at each stage of study—eg numbers potentially eligible, examined for eligibility, confirmed eligible, included in the study, completing follow-up, and analysed            | 8               |
|                          |     | (b) Give reasons for non-participation at each stage                                                                                                                                                         | NA              |
|                          |     | (c) Consider use of a flow diagram                                                                                                                                                                           | NA              |
| Descriptive data         | 14* | (a) Give characteristics of study participants (eg demographic, clinical, social) and information on exposures and potential confounders                                                                     | 8               |
|                          |     | (b) Indicate number of participants with missing data for each variable of interest                                                                                                                          | NA              |
|                          |     | (c) <i>Cohort study</i> —Summarise follow-up time (eg, average and total amount)                                                                                                                             | 8               |
| Outcome data             | 15* | <i>Cohort study</i> —Report numbers of outcome events or summary measures over time                                                                                                                          | 9               |
|                          |     | <i>Case-control study</i> —Report numbers in each exposure category, or summary measures of exposure                                                                                                         | NA              |
|                          |     | <i>Cross-sectional study</i> —Report numbers of outcome events or summary measures                                                                                                                           | NA              |
| Main results             | 16  | (a) Give unadjusted estimates and, if applicable, confounder-adjusted estimates and their precision (eg, 95% confidence interval). Make clear which confounders were adjusted for and why they were included | 8-10-<br>tables |
|                          |     | (b) Report category boundaries when continuous variables were categorized                                                                                                                                    | 8-10-<br>tables |
|                          |     | (c) If relevant, consider translating estimates of relative risk into absolute risk for a meaningful time period                                                                                             | 8-10-<br>tables |
| Other analyses           | 17  | Report other analyses done—eg analyses of subgroups and interactions, and sensitivity analyses                                                                                                               | 9-10            |
| <b>Discussion</b>        |     |                                                                                                                                                                                                              |                 |
| Key results              | 18  | Summarise key results with reference to study objectives                                                                                                                                                     | 11              |
| Limitations              | 19  | Discuss limitations of the study, taking into account sources of potential bias or imprecision. Discuss both direction and magnitude of any potential bias                                                   | 11-12           |
| Interpretation           | 20  | Give a cautious overall interpretation of results considering objectives, limitations, multiplicity of analyses, results from similar studies, and other relevant evidence                                   | 12              |
| Generalisability         | 21  | Discuss the generalisability (external validity) of the study results                                                                                                                                        | 12-13           |
| <b>Other information</b> |     |                                                                                                                                                                                                              |                 |
| Funding                  | 22  | Give the source of funding and the role of the funders for the present study and, if applicable, for the original study on which the present article is based                                                | 2               |

\*Give information separately for cases and controls in case-control studies and, if applicable, for exposed and unexposed groups in cohort and cross-sectional studies.

**Note:** An Explanation and Elaboration article discusses each checklist item and gives methodological background and published examples of transparent reporting. The STROBE checklist is best used in conjunction with this article (freely available on the Web sites of PLoS Medicine at <http://www.plosmedicine.org/>, Annals of Internal Medicine at <http://www.annals.org/>, and Epidemiology at <http://www.epidem.com/>). Information on the STROBE Initiative is available at [www.strobe-statement.org](http://www.strobe-statement.org).
